1 **Title**

2 Ca<sup>2+</sup>-driven cytoplasmic backflow secures spindle position in fertilized mouse eggs

3

4

5 **Authors**

6 Takaya Totsuka<sup>1,2,3</sup> and Miho Ohsugi<sup>1,2</sup> \*

7

8 **Affiliations**

9 1. Department of Life Sciences, Graduate School of Arts and Sciences, The University of Tokyo,  
10 Komaba 3-8-1, Meguro-ku, Tokyo 153-8902, Japan.

11 2. Department of Life Sciences, Graduate School of Arts and Sciences, The University of Tokyo,  
12 Hongo, Bunkyo-ku, Tokyo, 113-0033, Japan.

13 3. Cell and Developmental Biology Center, National Heart, Lung, and Blood Institute, National  
14 Institutes of Health, Bethesda 20892, MD, USA.

15

16

17 **Contact info**

18 \*Correspondence: [mihoohsugi@g.ecc.u-tokyo.ac.jp](mailto:mihoohsugi@g.ecc.u-tokyo.ac.jp)

19 **Abstract**

20 Fertilization triggers hours-long  $\text{Ca}^{2+}$  oscillations in mammalian eggs, but the effects of repeated  
21  $\text{Ca}^{2+}$  surges remain unclear. Here, we investigate spindle dynamics and its relationship with  
22 cytoplasmic streaming in fertilized mouse eggs. The spindle, initially parallel to the plasma  
23 membrane, rotates vertically, in accordance with previously reported results using artificially  
24 activated eggs. Intriguingly, it transiently reverses its rotation direction in synchrony with  $\text{Ca}^{2+}$   
25 oscillations, regardless of artificially altered frequency. This effect results from cytoplasmic  
26 streaming, initially moving from spindle to egg center, displaying a  $\text{Ca}^{2+}$ -dependent backflow.  
27 Streaming also impacts spindle positioning, balancing spindle rotation and cortical localization  
28 maintenance. We provide evidence that  $\text{Ca}^{2+}$ -dependent cortical myosin II activation causes  
29 actomyosin contraction, leading to transient streaming towards non-contracting actin cap regions  
30 overlaying chromosomes. Our findings underscore the role of  $\text{Ca}^{2+}$  oscillations in maintaining  
31 spindle position in fertilized eggs, thereby ensuring highly asymmetric division and preservation  
32 of maternal stores in zygotes.

33

## 34 **Main**

35 In vertebrates, eggs are arrested at metaphase II (Meta-II) while awaiting fertilization. The  
36 fusion between sperm and egg induces an elevation in free cytoplasmic  $\text{Ca}^{2+}$ , triggering release  
37 from Meta-II arrest and the onset of Anaphase II (Ana-II)<sup>1-4</sup>. Consequently, one set of segregated  
38 chromosomes is extruded into a smaller cell, known as the second polar body (PB2). The other  
39 set of chromosomes in the larger cell contribute to development together with the sperm-derived  
40 chromosomes<sup>5</sup>. This process is conserved among vertebrates. However, mammals exhibit unique  
41 features, such as the delay in pronuclear (PN) formation that takes over an hour following  
42 chromosome segregation<sup>6-10</sup>. Furthermore, in mouse Ana-II eggs, the spindle, initially parallel to  
43 the plasma membrane, must rotate perpendicularly<sup>5,11,12</sup>. In parthenogenetically activated eggs,  
44 the inward cytoplasmic streaming, generated in an actomyosin dependent manner, aids in rotating  
45 the Ana-II spindle. However, it remains unknown how the Ana-II spindle rotates in fertilized eggs  
46 while retaining its cortical localization, resisting the inward streaming.

47 Most non-mammalian species present a single or few waves of  $\text{Ca}^{2+}$  transients after fertilization,  
48 while mammals exhibit repeated  $\text{Ca}^{2+}$  oscillations over several hours until pronuclear formation<sup>13</sup>.  
49 However, the initial  $\text{Ca}^{2+}$  transient triggers primarily egg activation events, including meiotic  
50 resumption and polyspermy blocking<sup>14-18</sup> and the biological importance of continued  $\text{Ca}^{2+}$   
51 oscillations during the long Ana-II remains unclear.

52 In this article, we address these issues by developing a live-imaging method for mouse in vitro  
53 fertilized (IVF) eggs. Our findings indicate that each  $\text{Ca}^{2+}$  oscillation induces cortical actomyosin  
54 contraction, generating transient cytoplasmic backflow. This repetitive inversion of cytoplasmic  
55 streaming helps maintain the subcortical localization of the rotating Ana-II spindle, propelling it  
56 back to the cortex when displaced. Our results highlight the importance of mammalian-specific  
57  $\text{Ca}^{2+}$  oscillations in retaining spindle position to form a small polar body and a large egg,  
58 preserving maternal stores.

59

## 60 **Results**

### 61 **Rotating Ana-II spindle in IVF eggs shows periodic, transient decrease in rotation angle**

62 To investigate spindle rotational movement within fertilized mouse eggs, we first established a  
63 method for live imaging of the spindle dynamics throughout the process of IVF. We prepared a  
64 glass-bottom dish with two nearby medium drops, one with a Meta-II egg expressing EGFP-  
65 tagged  $\alpha$ -tubulin and mRFP1-tagged histone H2B, and the other with sperm, all covered with  
66 liquid paraffin. Before placing the eggs in the medium drop, an opening in the zona pellucida for  
67 sperm entry was made. The egg was positioned in the medium drop so that the long axis of the  
68 Meta-II spindle aligned parallel to the focal plane at the equatorial plane of the egg, and then  
69 stabilized using a holding pipette. After initiating live observation, two drops of medium were

70 connected for insemination (Fig. 1a). Confocal images, covering the entire short axis of the Meta-  
71 II spindle, were collected every 1  $\mu\text{m}$  along the z-axis for a total depth of 15  $\mu\text{m}$ . Using this  
72 imaging protocol, we captured the dynamics of the chromosomes and spindles from Meta-II to  
73 the extrusion of PB2 continuously (Fig. 1b and supplementary Video 1). This indicates that  
74 chromosome segregation and spindle rotation occurred in the xy-plane, where the long axis of the  
75 Meta-II spindle lies, with minor movement along the z-axis. This allowed us to analyze spindle  
76 dynamics in detail using z-stack projection images.

77 The rotational movement of the Ana-II spindle was analyzed using time-lapse images taken  
78 every minute. In each image, the midpoint of the centroids of the separated chromosomes was  
79 defined as the spindle midpoint; and the angle formed by the line connecting the chromosome  
80 centroids and the line connecting the spindle midpoint and the centroid of the egg cell was defined  
81 as the angle ( $\alpha$ ) (Fig. 1c). We set the angle ( $\alpha$ ) in the image taken 10 min after the onset of Ana-  
82 II ( $\alpha_{10}$ ) as the standard and plotted subsequent changes in angle as the spindle rotation angle ( $\alpha_{\text{sp}}$ ).  
83 Overall, the spindle angle increased over time, aligning with previously reported results using  
84 parthenogenetically activated eggs<sup>19,20</sup>. However, most IVF eggs exhibited a periodic, transient  
85 decrease in the rotation angle (Fig. 1d).

86

### 87 **Ca<sup>2+</sup> oscillations cause repeated transient inversions in the direction of spindle rotation**

88 A decrease in the rotation angle was observed every 5–15 min, although the interval varied  
89 among eggs. This pattern is similar to the interval between transient increases in Ca<sup>2+</sup> in fertilized  
90 mouse eggs<sup>21</sup>. As expected, simultaneous observation of spindle dynamics and intracellular Ca<sup>2+</sup>  
91 changes in IVF eggs revealed that when the Ca<sup>2+</sup> concentration was low, spindles rotated in a  
92 positive direction; however, immediately after a Ca<sup>2+</sup> transient, the direction of spindle rotation  
93 changed rapidly and temporarily switched to a negative direction (Fig. 2a,b and expanded Fig. 1a  
94 and Supplementary Video 2, top panels). A correlation between the temporal reversal of the  
95 rotational direction of the spindle and the Ca<sup>2+</sup> transient was also observed in eggs activated by  
96 Sr<sup>2+</sup> (hereafter referred to as Sr<sup>2+</sup>-activated eggs), which exhibit Ca<sup>2+</sup> oscillations similar to  
97 fertilized eggs<sup>22</sup> (Fig. 2c,d and Expanded Data Fig. 1b and Supplementary Video 2, bottom panels).  
98 These results demonstrate that the periodicity of spindle rotational movement coincides with that  
99 of Ca<sup>2+</sup> oscillations independent of sperm-derived factors.

100 Next, to examine the impact of changes in Ca<sup>2+</sup> oscillations on the spindle rotation, we first  
101 tried to increase the frequency of Ca<sup>2+</sup> oscillations using human-PLC $\zeta$ <sup>23–25</sup>. Exogenously  
102 expressed human-PLC $\zeta$  increased the frequency of Ca<sup>2+</sup> oscillations in a dose-dependent manner,  
103 but only either before or after spindle rotation. We then combined human-PLC $\zeta$  expression with  
104 Sr<sup>2+</sup> activation and succeeded in triggering high-frequency Ca<sup>2+</sup> oscillations during spindle  
105 rotation (Fig. 3a,b). A correlation between the temporal change in the rotation direction and the

106  $\text{Ca}^{2+}$  transient was observed even in eggs with increased frequency of  $\text{Ca}^{2+}$  oscillations (Fig 3b,c  
107 and Extended Data Fig. 1c). Second, thapsigargin, an inhibitor of sacro-ER  $\text{Ca}^{2+}$ -ATPase  
108 (SERCA)<sup>26,27</sup>, was added to the medium during the early Ana-II to inhibit  $\text{Ca}^{2+}$  oscillations (Fig.  
109 3d). Following this inhibition, the spindle exhibited smooth rotational movement, without any  
110 transient reversal in its rotation direction (Fig. 3e and Extended Data Fig. 1d). Together, these  
111 results indicate that elevated cytoplasmic  $\text{Ca}^{2+}$  levels reverse spindle rotation.

112

### 113 **$\text{Ca}^{2+}$ -induced outward cytoplasmic streaming causes a reversal of spindle rotation**

114 To further investigate the  $\text{Ca}^{2+}$ -dependent changes in the direction of spindle rotation, we  
115 analyzed cytoplasmic streaming, considering its supposed role in driving spindle rotation during  
116 Ana-II<sup>19,20</sup>. Using particle image velocimetry (PIV; see Materials and Methods), we revealed that  
117 in Ana-II, inward cytoplasmic streaming was observed as previously reported<sup>19</sup>, but immediately  
118 after the  $\text{Ca}^{2+}$  levels peaked, the orientation of the streaming reversed transiently to outward (Fig.  
119 4a-c and Expanded Data Fig. 2a and Supplementary Video 3). The directions of spindle rotation  
120 and cytoplasmic streaming always coincided: when cytoplasmic streaming was inward or outward,  
121 the spindle rotated in the positive or negative direction, respectively (Expanded Data Fig. 2b). To  
122 clarify the causal relationship between directional changes of cytoplasmic streaming and spindle  
123 rotation, we utilized a method of partial spindle disruption using low-dose nocodazole. This  
124 approach halted chromosome segregation and spindle rotation without compromising meiotic  
125 resumption upon egg activation<sup>28</sup>. The low-dose nocodazole did not affect  $\text{Ca}^{2+}$  oscillations, and  
126 the cytoplasmic streaming was oriented outward immediately after each  $\text{Ca}^{2+}$  transient, even in  
127 the absence of spindle rotation (Fig. 4d-f and Expanded Data Fig. 2c and Supplementary Video  
128 4). These results demonstrate that elevated cytoplasmic levels of  $\text{Ca}^{2+}$  induce the inversion of  
129 cytoplasmic streaming, thereby changing the direction of spindle rotation.

130

### 131 **$\text{Ca}^{2+}$ oscillations are involved in the maintenance of the subcortical localization of the Ana-II spindle and ensure the extrusion of small-sized PB2**

132  
133 What is the physiological importance of  $\text{Ca}^{2+}$ -induced changes in cytoplasmic streaming? To  
134 address this question, we next focused on the position of the Ana-II spindle because in Meta-II-  
135 arrested eggs, both inward and outward cytoplasmic streaming affect the position of the spindle  
136 and even transports it to the egg center<sup>29</sup>. The position of the Ana-II spindle was analyzed by  
137 measuring the distance between the midpoint of the spindle and the centroid of the egg (Fig. 5a).  
138 In most of the  $\text{Sr}^{2+}$ -activated eggs, inward cytoplasmic streaming resulted in a slight displacement  
139 of the spindle toward the interior of the egg. Conversely, when outward cytoplasmic streaming  
140 occurred, the spindle relocated toward the cortex, while consistently maintaining a certain  
141 distance from the plasma membrane (Fig. 5b,c). We also observed an egg in which the spindle

142 unintentionally shifted away from the cell membrane during the early Ana-II stage. In this egg,  
143 the spindle gradually moved closer to the plasma membrane each time the cytoplasm flowed  
144 outward (Fig. 5d,e). These results suggest that transient, repetitive outward cytoplasmic streaming  
145 induced by  $\text{Ca}^{2+}$  oscillations is involved in maintaining the subcortical localization of the Ana-II  
146 spindle.

147 Subcortical localization of the Ana-II spindle is essential for the formation of the small PB2<sup>30</sup>.  
148 Therefore, to examine this hypothesis, we tested the effect of no- or lower-frequency of  $\text{Ca}^{2+}$   
149 oscillations on the size of the PB2. First, we activated eggs with  $\text{Sr}^{2+}$  or 7% ethanol and found  
150 that 9.1% and 18.6% of the eggs, respectively, extruded a larger PB2 (Fig. 5f,g). Additionally,  
151  $\text{Sr}^{2+}$ -activated eggs were treated with thapsigargin 10 min after immersing them in the  $\text{Sr}^{2+}$ -  
152 containing medium drop. This inhibited  $\text{Ca}^{2+}$  oscillations almost completely before the  
153 beginning of spindle rotation (Supplementary Video 5). In the presence of 5 or 10  $\mu\text{M}$   
154 thapsigargin 11.1% and 13.4% of eggs extruded a large-sized PB2, respectively, whereas 7.7%  
155 of the control DMSO-treated activated eggs formed a larger PB2 (Fig. 5f,g). These results  
156 suggest that  $\text{Ca}^{2+}$  oscillations change the direction of cytoplasmic streaming toward the  
157 chromosomes, thereby contributing to the maintenance of the subcortical localization of the  
158 rotating spindle (Fig. 5h).

159

### 160 **Cortical actomyosin contraction generates cytoplasmic flow toward the non-contracted** 161 **actin cap regions**

162 To uncover the mechanisms underlying the change in cytoplasmic streaming upon elevated  
163 cytoplasmic  $\text{Ca}^{2+}$ , we first performed PIV analysis using time-lapse images of the IVF eggs, in  
164 which both maternal and paternal chromosomes appear within the same 15  $\mu\text{m}$  thick z-sections.  
165 Similar to  $\text{Sr}^{2+}$ -activated eggs, the direction of cytoplasmic streaming in IVF eggs was inward  
166 from the regions of the Ana-II spindle during the intervals between each  $\text{Ca}^{2+}$  peak. In contrast,  
167 immediately after  $\text{Ca}^{2+}$  levels peaked, cytoplasmic streaming was oriented toward both the  
168 maternal and paternal chromosomes (Fig. 6 and Expanded Data Fig. 3 and Supplementary Video  
169 6). These results suggest that elevated levels of cytoplasmic  $\text{Ca}^{2+}$  change the direction of  
170 cytoplasmic streaming toward the chromosomes, rather than simply backward.

171 Given that the contraction of actomyosin has been reported to drive cytoplasmic movement in  
172 fertilized eggs<sup>31</sup>, we next proceeded with experiments to inhibit myosin II by adding blebbistatin  
173 10 min after the onset of Ana-II.  $\text{Ca}^{2+}$  oscillations remained unaffected, yet the velocity of both  
174 inward and outward cytoplasmic streaming significantly decreased (Fig. 7a,b and Expanded Data  
175 Fig. 4 and Supplementary Video 7). This suggests that the activity of myosin II at disparate sites  
176 is the underlying cause of both inward and  $\text{Ca}^{2+}$ -dependent outward cytoplasmic streaming. To  
177 further examine this possibility, we visualized F-actin in  $\text{Sr}^{2+}$ -activated eggs and observed

178 periodic fluctuations in F-actin intensity (Supplementary Video 8). Quantitative analysis revealed  
179 that in the cortical regions, the F-actin intensity increased concomitantly with a slight but distinct  
180 contraction of the cortical plasma membrane, outward movement of cytoplasmic streaming, and  
181 expansion of the protrusions in the actin cap regions (Fig. 7c-e). The changes in F-actin intensity  
182 within the cytoplasm contrasted and complemented the changes in the cortical regions (Fig. 7e).  
183 Previous studies demonstrate that active myosin II was localized exclusively to the regions  
184 surrounding the two protrusions overlying the segregated chromosomes and the furrow region  
185 enclosed by these two protrusions, as well as to the region surrounding the fertilization  
186 cone<sup>19,20,31,32</sup>. Immunofluorescence staining with an anti-phosphorylated regulatory myosin light  
187 chain (pMLC) antibody revealed that in addition to these sites, approximately 12.4% of the Sr<sup>2+</sup>-  
188 activated eggs exhibited cortical MLC phosphorylation (Fig. 7f and Extended Data Fig. 5a,b),  
189 whereas ethanol-activated eggs did not exhibit MLC phosphorylation at the cortex (Extended  
190 Data Fig. 5c). Moreover, in Ana-II eggs with cortical MLC phosphorylation, cortical F-actin was  
191 more pronounced than in those without cortical MLC phosphorylation (Fig. 7g), supporting the  
192 idea that cortical actomyosin contraction causes cortical actin thickening.

193 In summary, we propose that Ca<sup>2+</sup>-induced contraction of cortical actomyosin pushes the  
194 adjacent cytoplasm toward the center of the cell. This merges into the streaming toward the  
195 uncontracted regions, specifically the actin cap around the maternal chromosomes and the  
196 fertilization cone around the paternal chromatin (Fig. 7h).

197

## 198 **Discussion**

199 In this study, we describe a first-time detailed examination of spindle dynamics in fertilized  
200 mouse eggs. Our straightforward yet effective live imaging approach revealed two features of the  
201 Ana-II spindle rotational movement in fertilized mouse eggs. First, the spindle rotates two-  
202 dimensionally in the equatorial plane, wherein its long axis resides within the Meta-II egg. This  
203 has been assumed in previous studies using artificially activated eggs but was directly  
204 demonstrated in this study and could provide important insights into understanding the nature of  
205 forces driving spindle rotation in mouse Ana-II eggs. Second, the rotating Ana-II spindle  
206 transiently reverses its rotation direction upon cytoplasmic Ca<sup>2+</sup> elevation. Repeated transient  
207 changes in the rotation angle disappeared when Ca<sup>2+</sup> oscillations were suppressed by thapsigargin  
208 (Fig. 3e). This is consistent with previous reports that in ethanol-stimulated eggs, in which only a  
209 single or a few waves of Ca<sup>2+</sup> transients were observed, the rotation angle of the spindle increased  
210 smoothly and with an almost constant velocity<sup>19</sup>.

211 We have uncovered, for the first time, the effects induced in eggs by mammalian-specific  
212 calcium dynamics, Ca<sup>2+</sup> oscillations, triggered by sperm fusion. Our results show that throughout  
213 Ana-II, the spindle undergoes a cycle wherein it is subjected to inward cytoplasmic streaming,

214 lasting several to tens of minutes, followed by a backflow of a few minutes that occurs in  
215 synchronization with  $\text{Ca}^{2+}$  oscillations. In Meta-II eggs, inhibition of the Arp2/3 complex induces  
216 myosin II-dependent inward cytoplasmic streaming, moving the spindle toward the egg center<sup>29</sup>.  
217 This implies that Ana-II spindle is constantly at risk of moving away from the cortex. Indeed,  
218 despite the centralspindlin complex anchoring the central spindle to the cortex<sup>20</sup>, there are  
219 occasional instances where the spindle inadvertently detaches from the cortex (Fig. 5d,e and  
220 Supplementary Video 5, bottom panels). In such cases,  $\text{Ca}^{2+}$ -dependent cytoplasmic streaming  
221 toward the spindle counteracts the inward streaming and assists in maintaining cortical spindle  
222 localization. Thus,  $\text{Ca}^{2+}$  oscillations specific to mammalian eggs help mitigate the risks posed by  
223 the long-lasting Ana-II phase unique to mammals<sup>8,10</sup>. The Ana-II spindle rotation is essential for  
224 the proper extrusion of PB2 in mouse eggs<sup>5,12,33</sup>. However, in many other mammals, including  
225 humans, the long axis of the Meta-II spindle is perpendicular to the cell membrane and does not  
226 require rotation<sup>34-36</sup>. In contrast, regardless of the spindle orientation, the Ana-II spindle must  
227 sustain its cortical localization until the completion of cytokinesis. Therefore, we believe that the  
228 importance of  $\text{Ca}^{2+}$ -dependent outward cytoplasmic streaming lies not in its ability to control  
229 spindle rotation speed, but in ensuring the subcortical localization of the Ana-II spindle and  
230 formation of a large fertilized egg<sup>30</sup>.

231 Observation of fertilized eggs revealed that the  $\text{Ca}^{2+}$ -induced cytoplasmic streaming is not  
232 simply reversing the preceding flow, but is rather directed toward the membrane regions lined by  
233 the actin cap structure (Fig. 6 and Extended Data Fig. 3). Based on our results and previous  
234 observations<sup>19,20</sup>, we propose that inward and outward cytoplasmic streaming is driven by the  
235 continuous contraction of actomyosin near the Ana-II spindle and intermittent contractions of  
236 other cortical membrane regions due to MLC phosphorylation by myosin light chain kinase  
237 (MLCK), which is activated by  $\text{Ca}^{2+}/\text{CaM}$ <sup>14</sup>, respectively. This model can explain the distinctive  
238 changes in  $\text{Ca}^{2+}$ -dependent cytoplasmic streaming, which initially flows toward the developing  
239 PB2 as well as fertilization cone, would later transition into a fast, clear flow toward the  
240 fertilization cone after the formation of PB2<sup>31,37</sup>.

241 Cytoplasmic movement in fertilized eggs can predict subsequent developmental potential<sup>31</sup>.  
242 This could be attributed to the effect of  $\text{Ca}^{2+}$ -independent and dependent cytoplasmic streaming  
243 on the arrangement of spindles, chromosomes, and various other organelles within the fertilized  
244 egg<sup>38,39</sup>. Observing the movement of cytoplasm and its impacts in zygotes of diverse mammals  
245 could further deepen our understanding of the significance of  $\text{Ca}^{2+}$  oscillations in mammals.



246 **Main references**

- 247 1. Jones, K. T. Mammalian egg activation: From Ca<sup>2+</sup> spiking to cell cycle progression.  
248 *Reproduction* **130**, 813–823 (2005).
- 249 2. Rauh, N. R., Schmidt, A., Bormann, J., Nigg, E. A. & Mayer, T. U. Calcium triggers exit  
250 from meiosis II by targeting the APC/C inhibitor XErp1 for degradation. *Nature* **437**,  
251 1048–1052 (2005).
- 252 3. Schmidt, A. *et al.* Xenopus polo-like kinase Plx1 regulates XErp1, a novel inhibitor of  
253 APC/C activity. *Genes Dev.* **19**, 502–513 (2005).
- 254 4. Schmidt, A., Rauh, N. R., Nigg, E. A. & Mayer, T. U. Cytostatic factor: An activity that  
255 puts the cell cycle on hold. *J. Cell Sci.* **119**, 1213–1218 (2006).
- 256 5. Maro, B., Johnson, M. H., Webb, M. & Flach, G. Mechanism of polar body formation in  
257 the mouse oocyte: An interaction between the chromosomes, the cytoskeleton and the  
258 plasma membrane. *J. Embryol. Exp. Morphol.* **VOL. 92**, 11–32 (1986).
- 259 6. Fan, H.-Y. & Sun, Q.-Y. Involvement of mitogen-activated protein kinase cascade  
260 during oocyte maturation and fertilization in mammals. *Biol. Reprod.* **70**, 535–547  
261 (2004).
- 262 7. Soeda, S., Yamada, K. & Ohsugi, M. Inactivation of mitogen-activated protein kinase is  
263 neither necessary nor sufficient for the onset of pronuclear formation in mouse oocytes.  
264 *Genes to Cells* **18**, 850–858 (2013).
- 265 8. Soeda, S., Yamada-Nomoto, K., Michiue, T. & Ohsugi, M. RSK-MASTL Pathway  
266 Delays Meiotic Exit in Mouse Zygotes to Ensure Paternal Chromosome Stability. *Dev.*  
267 *Cell* **47**, 363-376.e5 (2018).
- 268 9. Tatemoto, H. & Muto, N. Mitogen-activated protein kinase regulates normal transition  
269 from metaphase to interphase following parthenogenetic activation in porcine oocytes.  
270 *Zygote* **9**, 15–23 (2001).
- 271 10. Zhou, C. & Homer, H. A. The oocyte spindle midzone pauses Cdk1 inactivation during  
272 fertilization to enable male pronuclear formation and embryo development. *Cell Rep.*  
273 **39**, 110789 (2022).
- 274 11. Maro, B. & Verlhac, M. H. Polar body formation: New rules for asymmetric divisions.  
275 *Nat. Cell Biol.* **4**, 281–283 (2002).
- 276 12. Wang, Q., Racowsky, C. & Deng, M. Mechanism of the chromosome-induced polar  
277 body extrusion in mouse eggs. *Cell Div.* **6**, 1–9 (2011).
- 278 13. Jones, K. T., Carroll, J., Merriman, J. A., Whittingham, D. G. & Kono, T. Repetitive  
279 sperm-induced Ca<sup>2+</sup> transients in mouse oocytes are cell cycle dependent. *Development*  
280 **121**, 3259–3266 (1995).
- 281 14. Ducibella, T. & Fissore, R. The roles of Ca<sup>2+</sup>, downstream protein kinases, and

- 282 oscillatory signaling in regulating fertilization and the activation of development. *Dev.*  
283 *Biol.* **315**, 257–279 (2008).
- 284 15. Ducibella, T., Kurasawa, S., Duffy, P., Kopf, G. S. & Schultz, R. M. Regulation of the  
285 polyspermy block in the mouse egg: Maturation-dependent differences in cortical  
286 granule exocytosis and zona pellucida modifications induced by inositol 1,4,5-  
287 trisphosphate and an activator of protein kinase C. *Biol. Reprod.* **48**, 1251–1257 (1993).
- 288 16. Ozil, J. P. *et al.* Egg activation events are regulated by the duration of a sustained  
289  $[Ca^{2+}]_{cyt}$  signal in the mouse. *Dev. Biol.* **282**, 39–54 (2005).
- 290 17. Schultz, R. M. & Kopf, G. S. 2 Molecular Basis of Mammalian Egg Activation. in (eds.  
291 Pedersen, R. A. & Schatten, G. P. B. T.-C. T. in D. B.) **30**, 21–62 (Academic Press,  
292 1995).
- 293 18. Swann, K. & Ozil, J. P. Dynamics of the Calcium Signal That Triggers Mammalian Egg  
294 Activation. *Int. Rev. Cytol.* **152**, 183–222 (1994).
- 295 19. Dehapiot, B. *et al.* RhoA- And Cdc42-induced antagonistic forces underlie symmetry  
296 breaking and spindle rotation in mouse oocytes. *PLoS Biol.* **19**, 1–30 (2021).
- 297 20. Wang, H. Y. *et al.* Symmetry breaking in hydrodynamic forces drives meiotic spindle  
298 rotation in mammalian oocytes. *Sci. Adv.* **6**, (2020).
- 299 21. Swann, K., Saunders, C. M., Rogers, N. T. & Lai, F. A. PLC $\zeta$ (zeta): A sperm protein  
300 that triggers  $Ca^{2+}$  oscillations and egg activation in mammals. *Semin. Cell Dev. Biol.* **17**,  
301 264–273 (2006).
- 302 22. Zhang, D. *et al.* Strontium promotes calcium oscillations in mouse meiotic oocytes and  
303 early embryos through InsP3 receptors, and requires activation of phospholipase and the  
304 synergistic action of InsP3. *Hum. Reprod.* **20**, 3053–3061 (2005).
- 305 23. Miura, K. *et al.* Application of auxin-inducible degron technology to mouse oocyte  
306 activation with PLC $\zeta$ . *J. Reprod. Dev.* **64**, 319–326 (2018).
- 307 24. Sato, K. *et al.* Molecular characteristics of horse phospholipase C zeta (PLC $\zeta$ ). *Anim.*  
308 *Sci. J.* **84**, 359–368 (2013).
- 309 25. Ito, M. *et al.* Difference in  $Ca^{2+}$  oscillation-inducing activity and nuclear translocation  
310 ability of PLCZ1, an egg-activating sperm factor candidate, between mouse, rat, human,  
311 and medaka fish. *Biol. Reprod.* **78**, 1081–1090 (2008).
- 312 26. Kline, D. & Kline, J. T. Thapsigargin activates a calcium influx pathway in the  
313 unfertilized mouse egg and suppresses repetitive calcium transients in the fertilized egg.  
314 *J. Biol. Chem.* **267**, 17624–17630 (1992).
- 315 27. Wakai, T., Zhang, N., Vangheluwe, P. & Fissore, R. A. Regulation of endoplasmic  
316 reticulum  $Ca^{2+}$  oscillations in mammalian eggs. *J. Cell Sci.* **126**, 5714–5724 (2013).
- 317 28. Totsuka, T. & Ohsugi, M. Production of mouse androgenetic embryos using spindle

- 318 perturbation. *Sci. Rep.* **10**, 1–9 (2020).
- 319 29. Yi, K. *et al.* Dynamic maintenance of asymmetric meiotic spindle position through  
320 Arp2/3-complex-driven cytoplasmic streaming in mouse oocytes. *Nat. Cell Biol.* **13**,  
321 1252–1258 (2011).
- 322 30. Sun, S. C. *et al.* Arp2/3 complex regulates asymmetric division and cytokinesis in mouse  
323 oocytes. *PLoS One* **6**, (2011).
- 324 31. Ajduk, A. *et al.* Rhythmic actomyosin-driven contractions induced by sperm entry  
325 predict mammalian embryo viability. *Nat. Commun.* **2**, (2011).
- 326 32. Simerly, C., Nowak, G., De Lanerolle, P. & Schatten, G. Differential expression and  
327 functions of cortical myosin IIa and IIb isoforms during meiotic maturation, fertilization,  
328 and mitosis in mouse oocytes and embryos. *Mol. Biol. Cell* **9**, 2509–2525 (1998).
- 329 33. Zhu, Z.-Y. *et al.* Rotation of Meiotic Spindle Is Controlled by Microfilaments in Mouse  
330 Oocytes1. *Biol. Reprod.* **68**, 943–946 (2003).
- 331 34. Roeles, J. & Tsiavalariis, G. Actin-microtubule interplay coordinates spindle assembly in  
332 human oocytes. *Nat. Commun.* **10**, 1–10 (2019).
- 333 35. Tremoleda, J. L., Schoevers, E. J., Stout, T. A., Colenbrander, B. & Bevers, M. M.  
334 Organisation of the cytoskeleton during in vitro maturation of horse oocytes. *Mol.*  
335 *Reprod. Dev.* **60**, 260–269 (2001).
- 336 36. Da Broi, M. G., Malvezzi, H., Paz, C. C. P., Ferriani, R. A. & Navarro, P. A. A. S.  
337 Follicular fluid from infertile women with mild endometriosis may compromise the  
338 meiotic spindles of bovine metaphase II oocytes. *Hum. Reprod.* **29**, 315–323 (2014).
- 339 37. Deguchi, R., Shirakawa, H., Oda, S., Mohri, T. & Miyazaki, S. Spatiotemporal analysis  
340 of  $Ca^{2+}$  waves in relation to the sperm entry site and animal-vegetal axis during  $Ca^{2+}$   
341 oscillations in fertilized mouse eggs. *Dev. Biol.* **218**, 299–313 (2000).
- 342 38. Lu, W. & Gelfand, V. I. Go with the flow - bulk transport by molecular motors. *J. Cell*  
343 *Sci.* **136**, (2023).
- 344 39. Mori, M. *et al.* RanGTP and the actin cytoskeleton keep paternal and maternal  
345 chromosomes apart during fertilization. *J. Cell Biol.* **220**, (2021).
- 346

347 **Figure legends**

348 **Fig.1 Spindle dynamics in IVF eggs**

349 **a**, Schematics showing live imaging method for IVF eggs. Confocal images of z-slices covering  
350 the entire width of the spindle short axis in orientation-adjusted Meta-II eggs (left). Two medium  
351 drops, one containing a Meta-II egg held by a pipette and the other with sperm, were prepared on  
352 a paraffin-covered glass-bottom dish (middle). Two drops of medium were connected for  
353 insemination (right panel). **b**, Representative time-lapse images showing chromosomal and  
354 spindle dynamics in IVF eggs expressing mRFP1-tagged histone H2B (magenta) and EGFP-  
355 tagged- $\alpha$ -tubulin (green). The numbers above the top panels indicate the time before and after the  
356 onset of Ana-II. **c**, Schematics showing the quantification of the spindle rotation angle. **d**, Change  
357 over time in spindle rotation angle for six IVF eggs.

358

359 **Fig.2 Direction of the spindle rotation transiently reverses coincidence with the  $\text{Ca}^{2+}$**   
360 **transient**

361 **a,c**, Graphs showing the spindle rotation angle (magenta) and relative intensity of cytoplasmic  
362  $\text{Ca}^{2+}$  levels (green) in representative IVF **a**, or  $\text{Sr}^{2+}$ -activated **c** eggs. **b,d**, Heat maps showing the  
363 normalized angular velocity ( $\Delta t = 1$  min) of spindle rotation for several minutes before and after the  
364  $\text{Ca}^{2+}$  transient in IVF eggs (23 peaks, 8 IVF eggs) **b**, or in  $\text{Sr}^{2+}$ -activated eggs (34 peaks, 11 eggs) **d**.  
365 The timing of the  $\text{Ca}^{2+}$  transient is enclosed by a black square.

366

367 **Fig.3 Inversions in the direction of spindle rotation depends on  $\text{Ca}^{2+}$  transients**

368 **a**, The frequency of  $\text{Ca}^{2+}$  oscillations during 10 to 70 min after Ana-II onset in  $\text{Sr}^{2+}$ -activated eggs  
369 expressing or not human-PLC $\zeta$ . The gray bars indicate average values. \*,  $p < 0.05$ ; Welch's t test.  
370 **b**, A graph showing the spindle rotation angle (magenta) and relative intensity of cytoplasmic  
371  $\text{Ca}^{2+}$  levels (green) in representative  $\text{Sr}^{2+}$ -activated eggs expressing human-PLC $\zeta$ . **c**, Heat map  
372 showing the normalized angular velocity ( $\Delta t = 1$  min) of spindle rotation for several minutes  
373 before and after the  $\text{Ca}^{2+}$  transient in human-PLC $\zeta$  expressing  $\text{Sr}^{2+}$ -activated eggs (48 peaks, 11  
374 eggs). The timing of the  $\text{Ca}^{2+}$  transient is enclosed by a black square. **d**, Schematic of thapsigargin  
375 treatment for Ana-II eggs during live observation. **e**, Graph showing the spindle rotation angle  
376 (magenta) and relative intensity of cytoplasmic  $\text{Ca}^{2+}$  levels (green) in a representative  
377 thapsigargin-treated egg. Orange bars indicate the time of thapsigargin addition.

378

379 **Fig.4 Cytoplasmic streaming inverts immediately after  $\text{Ca}^{2+}$  levels peak**

380 **a,d**, Representative images showing chromosomes (magenta) and cytoplasmic  $\text{Ca}^{2+}$  levels (green)  
381 in a  $\text{Sr}^{2+}$ -activated egg **a**, or a  $\text{Sr}^{2+}$ -activated egg treated with 0.08  $\mu\text{g}/\text{mL}$  nocodazole **d** at a time  
382 point before and immediately after the  $\text{Ca}^{2+}$  transient, merged with bright field (top panels).

383 Colored heat maps of vectors indicate the direction and velocity of cytoplasmic streaming  
384 analyzed using PIV as v-component (bottom panels). The numbers above the top panels indicate  
385 the time after Ana-II onset **a**, or  $\text{Sr}^{2+}$ -activation **d** (min). **b,e**, Graphs show the velocity of  
386 cytoplasmic streaming (blue) and relative intensity of cytoplasmic  $\text{Ca}^{2+}$  levels (green) in the eggs  
387 shown in **a** and **d**, respectively. The velocity of cytoplasmic streaming was analyzed within the orange  
388 frames in the upper panels of **a** and **d**. **c,f**, Heat maps showing the normalized velocity of  
389 cytoplasmic streaming for several minutes before and after the  $\text{Ca}^{2+}$  transient in  $\text{Sr}^{2+}$ -activated  
390 eggs (34 peaks, 11 eggs) **c**, or in  $\text{Sr}^{2+}$ -activated eggs treated with 0.08  $\mu\text{g}/\text{mL}$  nocodazole (25  
391 peaks, 6 eggs) **f**. The timing of the  $\text{Ca}^{2+}$  transient is enclosed by a black square.

392

### 393 **Fig.5 $\text{Ca}^{2+}$ oscillations ensure the extrusion of a small-sized PB2**

394 **a**, Schematic showing the quantification of the spindle position and distance ( $d$ ) between the  
395 midpoint of the spindle and centroid of the egg. **b**, Representative time-lapse images showing the  
396 spindle position of a  $\text{Sr}^{2+}$ -activated egg expressing mRFP1-tagged histone H2B (magenta). **c**,  
397 Graph showing the spindle position (purple) and mean velocity of cytoplasmic streaming (blue)  
398 for 30 min after Ana-II onset of an egg shown in **b**. **d**, Representative time-lapse images of a  $\text{Sr}^{2+}$ -  
399 activated egg with spindle detachment from the plasma membrane during early Ana-II. **e**, Graph  
400 showing the spindle position (purple) and mean velocity of cytoplasmic streaming (blue) for 40  
401 min after Ana-II onset of an egg shown in **d**. **f**, Representative images show eggs at five hours of  
402 culturing after activation with  $\text{Sr}^{2+}$  (left), 7% ethanol (middle), and  $\text{Sr}^{2+}$  followed by thaprigargin  
403 treatment (right). White arrows indicate eggs with large PB2. **g**, Ratio of activated eggs with large  
404 and no PB2 under each activation condition. The numbers in the bars indicate the number of  
405 activated eggs in each category. n: number of activated eggs observed in each experiment. **h**,  
406 Model of the mechanism that ensures subcortical localization of the Ana-II rotating spindle.

407

### 408 **Fig.6 $\text{Ca}^{2+}$ -induced cytoplasmic streaming is oriented toward both parental chromosomes**

409 Representative images showing chromosomes (magenta) and cytoplasmic  $\text{Ca}^{2+}$  levels (green) in  
410 an IVF egg at a time point before and immediately after the  $\text{Ca}^{2+}$  transient merged with a bright  
411 field (top panels). Vector maps indicating the direction and velocity of cytoplasmic streaming  
412 analyzed using PIV (bottom panels). Black arrows indicate the positions of sperm chromosomes.  
413 Numbers above the top panels indicate the time after the onset of Ana-II.

414

### 415 **Fig.7 Direction of inverted cytoplasmic streaming is determined by spatial-asymmetric 416 contractions of cortical actomyosin**

417 **a**, Graph showing the velocity of cytoplasmic streaming (blue) and relative cytoplasmic  $\text{Ca}^{2+}$   
418 levels (green) in a blebbistatin-treated Ana-II egg. A black arrowhead indicates the time of

419 blebbistatin addition. **b**, Changes in inward (yellow) and outward (blue) cytoplasmic streaming  
420 at 30 min after blebbistatin treatment. The gray bars indicate average values. \*\*,  $p < 0.01$ ; Mann-  
421 Whitney test. **c**, Schematics showing the area where F-actin fluorescence intensity and plasma  
422 membrane dynamics were measured. **d**, Kymographs showing the plasma membrane dynamics  
423 of the actin cap region (region #1 in **c**) (top) and the cortical region (region #2 in **c**) (middle), and  
424 the graph showing the relative F-actin fluorescence intensity in the three cortical regions (region  
425 #2, 3, 4 in **c**) (bottom) of a representative egg. The timescales of the kymographs and graphs were  
426 consistent. **e**, Heat maps showing the normalized velocity of cytoplasmic streaming (top) and  
427 normalized F-actin fluorescence intensity in three cortical regions (region #2, 3, 4 in **c**) (middle)  
428 and the cytoplasmic region (region #5 in **c**) (bottom) in activated eggs before and after  
429 cytoplasmic streaming inversion. The minute zero indicates the timing of cytoplasmic streaming  
430 inversion (black squares). **f**, Top, representative immunofluorescent images of F-actin (magenta)  
431 and pMLC (green) in  $\text{Sr}^{2+}$ -activated eggs with (top panels) and without (middle panels) cortical  
432 pMLC signals. Bottom, graphs show the fluorescence intensity profiles of F-actin and pMLC  
433 along the dashed white lines in the upper panels. **g**, Representative immunofluorescent images of  
434 F-actin and pMLC in  $\text{Sr}^{2+}$ -activated Ana-II eggs. Asterisks indicate eggs with cortical pMLC (top  
435 panel). The bottom graph shows cortical F-actin signal ratios. The gray bars indicate average  
436 values. \*\*\*\*,  $p < 0.0001$ ; Mann-Whitney test. **h**, Model of  $\text{Ca}^{2+}$ -driven, chromosome-directed  
437 cytoplasmic flow.

438 **Methods**

439

440 **Mice**

441 The mouse strains used in this study were purchased from Charles River Laboratories (ICR mice)  
442 and CLEA Japan (female BALB/cA and male C57BL/6J mice). ICR mice were used for egg  
443 collection. Female BALB/cA and male C57BL/6J mice were cross-bred to obtain BALB/cA ×  
444 C57BL/6L F1 (CB6F1) mice, which were then used for sperm collection. All mice used in this  
445 study were 8–24-week-old. The animal experiments were approved by the Animal  
446 Experimentation Committee of the Graduate School of Arts and Sciences, The University of  
447 Tokyo (approval no. 26-29) and performed following the guidelines for animal use issued by the  
448 Committee of Animal Experiments at The University of Tokyo.

449

450 **Egg and sperm collection**

451 Female mice (8–16-week-old) were superovulated by intraperitoneal injection of 5 IU of pregnant  
452 mare serum gonadotropin (ZENOAG) for 48 h and 5 IU of human chorionic gonadotropin (Kyoritsu  
453 Seiyaku) for 18–20 h prior to egg collection. Egg-cumulus complexes were collected in an M2  
454 medium (M7167, Sigma-Aldrich) containing 100 µg/mL hyaluronidase to remove cumulus cells.  
455 Denuded Meta-II eggs were cultured in M16 medium (M7292, Sigma-Aldrich) covered with  
456 liquid paraffin (Specially Prepared Reagent, Nacalai tesque) at 37°C under 5% CO<sub>2</sub> until mRNA  
457 injection, followed by parthenogenic activation or insemination. Spermatozoa isolated from the  
458 cauda epididymis were precultured in HTF medium (ARK Resource) covered with liquid paraffin  
459 for at least 1 h at 37°C under 5% CO<sub>2</sub> before being used for insemination.

460

461 **Egg activation**

462 For Sr<sup>2+</sup> activation, we used the Sr<sup>2+</sup>-induced method<sup>40</sup>. Meta-II eggs were placed in M16 medium  
463 supplemented with 5 mM SrCl<sub>2</sub> and 5 mM EGTA and cultured at 37°C. For ethanol activation,  
464 Meta-II eggs were placed in M2 medium supplemented with 7% ethanol for 4.5 min at 25°C  
465 followed by washout and culture in M16 at 37°C. To induce high-frequency Ca<sup>2+</sup> oscillations,  
466 Meta-II eggs microinjected with mRNA of human-PLCζ were inculcated for 30 min and then  
467 placed in M16 medium supplemented with 2.5 mM SrCl<sub>2</sub> and 2.5 mM EGTA at 37°C.

468

469 **mRNA preparation and microinjection**

470 mRNA was synthesized in vitro with linearized template plasmids using the RiboMax Large  
471 Scale RNA Production System-T7 (Promega) supplemented with the Ribo m<sup>7</sup>G Cap Analog  
472 (Promega), as described previously<sup>41</sup>. Template plasmids for human-PLCζ were constructed  
473 using cDNA from a pcDNA-flag-human-PLCζ-AID-EGFP-polyA. The mRNA used for

474 microinjection were mRFP1-tagged histone H2B at 50 ng/ $\mu$ L, EGFP- $\alpha$ -tubulin at 200 ng/ $\mu$ L,  
475 EGFP-UtrCH at 100 to 400 ng/ $\mu$ L, and human-PLC $\zeta$  at 10 ng/ $\mu$ L. A minimal amount  
476 (picoliters) of mRNA was microinjected into Meta-II eggs using a piezo-driven  
477 micromanipulator (Prime Tech) and cultured for at least 3.5 h before being subjected to live  
478 imaging.

479

#### 480 **Live imaging**

481 Confocal images were collected with a microscope (IX71; OLYMPUS) equipped with a spinning  
482 disk confocal system (CSU10; Yokogawa), 60x/1.30 Sil or 20x/0.85 NA oil objective lens  
483 (OLYMPUS), and a CCD camera (iXon DU897E-CSO-#BV; ANDOR) controlled by Metamorph  
484 (Universal Imaging). To observe spindle dynamics with a 60x/1.30 Sil objective lens, confocal  
485 images were collected as z-stacks at 1- $\mu$ m intervals (number of optical z-stacks: 16) every minute.  
486 To observe multiple eggs with a 20x/0.85 NA oil lens, confocal images were collected as z-stacks  
487 at 5- $\mu$ m intervals (number of optical z-stacks: 16) every minute.

488

#### 489 **Live imaging of IVF eggs**

490 Removing cumulus cells causes the stiffness of the zona pellucida and prevents sperm from  
491 passing through it. Therefore, after the microinjection of mRNA, a hole was made in the zona  
492 pellucida some distance from the Meta-II spindle using a piezo-driven pipette for sperm entry  
493 through the zona pellucida, as described previously<sup>39</sup>. Meta-II eggs were immobilized by  
494 suctioning the position opposite the spindle with a holding pipette. Sperm cells separated using  
495 the swim-up method were placed into the HFT medium so that the sperm concentration was  $2.0$   
496  $\times 10^6$ /mL and were then cultured at 37°C under 5% CO<sub>2</sub>. For the live imaging of IVF eggs, we  
497 prepared two adjacent 3- $\mu$ L drops of M16 medium on a  $\Phi$ 3.5-cm glass-bottom dish, which was  
498 covered with liquid paraffin. After adding the mRNA-microinjected eggs with the hole in the zona  
499 pellucida and a few  $\mu$ l of  $2.0 \times 10^6$ /mL sperm to each medium drop, respectively, a glass-bottom  
500 dish was placed in a stage-top incubator at 37°C under 5% CO<sub>2</sub>. After immobilizing the  
501 orientation-adjusted Meta-II eggs using a holding pipette, insemination was performed by  
502 connecting two drops using a glass needle.

503

#### 504 **Live imaging of parthenogenetic-activated eggs**

505 mRNA-microinjected Meta-II eggs were washed in Sr<sup>2+</sup> activation medium and transferred to 3  
506  $\mu$ L of Sr<sup>2+</sup> activation medium covered with liquid paraffin on a glass-bottom dish. The orientation  
507 of the Meta-II eggs was adjusted by mouth pipetting so that the Meta-II spindle was in the  
508 equatorial plane of the eggs, with its axis parallel to the focal plane. A glass-bottom dish was then  
509 placed in the stage-top incubator at 37°C under 5% CO<sub>2</sub>.



510

### 511 **Monitoring the Ca<sup>2+</sup> oscillation**

512 To monitor the cytoplasmic Ca<sup>2+</sup>, Meta-II eggs were microinjected with a few picoliters of 1  
513 mg/mL of the Ca<sup>2+</sup>-sensitive fluorescent dye, Cal520®-Dextran Conjugate \*MW 3,000\* or Cal-  
514 590™-Dextran Conjugate \*MW 3,000\* (AAT Bioquest), along with mRNAs for the expression  
515 of the protein(s) of interest, followed by culturing for 4 hours until the start of live imaging.

516

### 517 **Drug treatment under live observation**

518 Medium drops containing the drugs dissolved in DMSO were prepared as previously reported<sup>28</sup>.  
519 For the thapsigargin treatment assay, two Sr<sup>2+</sup> activation medium drops, one containing 10 or  
520 20 μM thapsigargin and one without thapsigargin were placed close to each other on a glass-  
521 bottom dish and covered with 4 ml liquid paraffin followed by incubation at 37°C under 5% CO<sub>2</sub>  
522 for 30 to 60 min before live imaging. Eggs were placed in the thapsigargin-free medium drop and  
523 the glass-bottom dish was placed in a stage-top incubator at 37°C under 5% CO<sub>2</sub>. After  
524 immobilizing the orientation-adjusted eggs using a holding pipette equipped on the stage of a  
525 confocal microscope, the two drops were connected using a glass needle—5–10 min after Ana-II  
526 onset. Blebbistatin was applied 10 min after Ana-II onset to a final concentration of 100 μM,  
527 using the same method as in the thapsigargin treatment assay.

528

### 529 **Immunostaining**

530 Eggs were placed in acidic Tyrode's solution to remove their zona pellucida, followed by washout  
531 with 0.5% polyvinyl pyrrolidone/PBS and fixation in 4% paraformaldehyde for 30 min at 25°C.  
532 Fixed samples were permeabilized with 0.1% Triton-X100/PBS for 15 min at 25°C and then  
533 placed in a blocking solution (PBS containing 3% BSA and 0.1% Tween20) for 2 hours. After  
534 blocking, samples were incubated with the primary antibody, rabbit anti-phospho-myosin light  
535 chain 2 (Ser19) (pMLC) (1:100, Cell Signaling Technology #3671), for 2 hours, followed by three  
536 washes for 20 min. The samples were then incubated in the solution containing Alexa Fluor 488-  
537 conjugated goat anti-rabbit (1:500, A-11034, Invitrogen), rhodamine phalloidin (Invitrogen), and  
538 Hoechst 33342 dye (10 μg/mL, H-1399, Thermo Fisher Scientific) for 45 min, followed by three  
539 washes for 20 min. Z-stack images were collected at 1-μm intervals (number of optical z-stacks:  
540 90) to visualize the entire eggs using a fluorescence microscope (IX70; OLYMPUS) equipped  
541 with 60x/1.30 NA Sil or 20x/0.85 NA oil objective lens (OLIMPUS) and a cold CCD camera  
542 (CoolSNAP HQ; Roper Scientific) that was controlled using Delta Vision SoftWorx (Applied  
543 Precision). The Z-stack images were then deconvoluted.

544

### 545 **Image analysis**

546 To quantify the spindle rotation angle, the centroid of each separated chromosome (10 min after  
547 Ana-II onset before the beginning of spindle rotation), the egg, and the spindle midpoint were  
548 tracked by image processing using ImageJ. For the chromosome centroid, fluorescence images of  
549 the chromosomes (H2B-mRFP1) were smoothed with a median filter (radius = 2) and binarized  
550 using a threshold (Yen algorithm). For the egg centroid, the cytoplasmic fluorescence images of  
551 Cal-520-dextran or EGFP- $\alpha$ -tubulin or H2B-mRFP1 were smoothed with a median filter (radius  
552 = 10), then binarized using a threshold (Otsu algorithm). The centroid coordinates of the binarized  
553 images, defined as the x-y coordinates, were calculated using ImageJ. The spindle midpoint was  
554 defined as the midpoint between the centroids of the separated chromosome signals. The spindle  
555 rotation angle was quantified as the angle between the line connecting the centroids of the  
556 separated chromosome signals and the line connecting the egg centroid and spindle midpoint. The  
557 coordinates of the chromosome centroids at  $n$  min after Ana-II onset were defined as A ( $a_n, b_n$ )  
558 for the chromosomes eventually extruded as PB2 and A' ( $c_n, d_n$ ) for the chromosomes remaining  
559 in the eggs. The coordinates of the spindle midpoint and egg centroid  $n$  min after Ana-II onset  
560 were defined as B ( $e_n, f_n$ ) and B' ( $g_n, h_n$ ), respectively. The rotation angle is given by

561

$$\cos \theta = \frac{(c_n - a_n) \times (g_n - e_n) + (d_n - b_n) \times (h_n - f_n)}{\sqrt{(c_n - a_n)^2 + (d_n - b_n)^2} \times \sqrt{(g_n - e_n)^2 + (h_n - f_n)^2}} \quad (n \geq 10)$$

563

564 Conversion from radians to angles is given by

565

$$\alpha^\circ = \frac{180}{\pi} \times \theta$$

566

567 where  $\alpha^\circ$  is the rotation angle. The angles were normalized by subtracting all angles from the  
568 initial angle to calculate the rotation angle from the initial spindle position. To quantify  
569 normalized changes in the rotation angle, the angular velocity ( $\Delta t = 1$  min) a few minutes before  
570 and after the  $\text{Ca}^{2+}$  transient was divided by the absolute maximum angular velocity for the same  
571 period. All  $\text{Ca}^{2+}$  transients were maintained for 30 min during spindle rotation.

572 To quantify the spindle position within the egg, the distance ( $d$ ) between the spindle midpoint  
573 and egg centroid was calculated. The coordinates of both the spindle midpoint and egg centroid  
574 were obtained using the same method as that used to quantify the spindle rotation angle.

575  $\text{Ca}^{2+}$  oscillations were analyzed using the fluorescence signals of Cal-520-dextran. To measure  
576 the relative intensity of Cal-520-dextran, its cytoplasmic fluorescence images were smoothed  
577 using a median filter (radius = 10) and binarized using a threshold (Otsu algorithm). After defining  
578 a region of interest (ROI) using the binarized images of Cal-520-dextran, its mean fluorescence  
579 signals within the ROIs were measured. To calculate the relative intensity of cytoplasmic  $\text{Ca}^{2+}$ ,

580 Cal-520-dextran signals at each time point were divided by the minimum intensity for 30 min  
581 during spindle rotation.

582 The cortical F-actin intensity in live eggs was measured using EGFP-UtrCH fluorescence  
583 signals. A wide range of five pixels of cortical F-actin fluorescence signal was measured as  
584 cortical F-actin intensity. To obtain a width of 5 pixels, cytoplasmic fluorescence signals of  
585 histone H2B-mRFP1 were smoothed with a median filter (radius = 10) and binarized using a  
586 threshold (Otsu algorithm). Second, two binarized images were eroded or dilated so that the  
587 difference between the larger and smaller regions was 5 pixels, and ROIs were defined in each  
588 image, followed by the measurement of the mean fluorescence intensity of EGFP-UtrCH within  
589 the ROIs. Third, the mean fluorescence intensity of the dilated ROI was subtracted from that of  
590 the eroded ROI. Three cortical regions were selected for the analysis of cortical F-actin intensity.  
591 To calculate the relative intensity of cortical F-actin, the EGFP-UtrCH intensity at each time point  
592 was divided by the minimum intensity during 30 min of spindle rotation. For normalization, the  
593 relative intensity of cortical F-actin a few minutes before and after the cytoplasmic streaming  
594 inversion was divided by the absolute maximum intensity of cortical F-actin for the same period.

595 To validate the cortical myosin II activity in fixed eggs, the fluorescence intensity of pMLC  
596 was measured using the plot profile (line width: 20 pixels) in ImageJ. The line for the plot profile  
597 was drawn across the center of the egg to avoid the actin cap regions.

598 To validate the fluorescence intensity of cortical F-actin in the fixed eggs, the average of the  
599 two peak values of cortical F-actin intensity, measured using the plot profile (line width: 20 pixels),  
600 was calculated after subtracting the background intensity. Ratios of cortical F-actin intensity were  
601 obtained by dividing the average intensity of cortical F-actin in eggs with cortical pMLC signals  
602 by that in eggs without cortical pMLC signals.

603 The fluorescence intensities of pMLC and F-actin in the cortical region were analyzed using  
604 the fluorescence signals of maximum intensity z-projections (ten z-slices) around the egg  
605 equatorial plane.

606 All heat maps of the normalized values for each image analysis were generated using GraphPad  
607 Prism9 software.

608

### 609 **PIV analysis**

610 To analyze cytoplasmic streaming, cytoplasmic particle dynamics were tracked using the PIVlab  
611 package<sup>42</sup>. Fluorescent time-lapse images merged with a bright field were used to simultaneously  
612 analyze cytoplasmic streaming with spindle rotation and  $\text{Ca}^{2+}$  oscillations. Because the egg in the  
613 time-lapse images moved slightly in the x-y plane, the StackReg plugin written for ImageJ was  
614 used to stabilize the position of the eggs before PIV analysis. The non-egg area was masked to  
615 exclude vectors outside the egg. We used the following parameters for PIV analysis, similar to

616 those previously described<sup>19,20</sup>: CLAHE window size: 100 pixels, high-pass kernel size: 10 pixels,  
617 interrogation area of pass 1: 70 pixels, interrogation area of pass 2: 35 pixels, sub-pixel estimator:  
618 Gauss 2x3-point, correlation robustness: standard. The analyzed vector maps were adjusted and  
619 smoothed using vector validation and modification functions, respectively. For display purposes,  
620 the velocity magnitude of cytoplasmic streaming in the y-axis direction of the x-y plane (the axis  
621 perpendicular to the spindle) was colored using the v-component of the display function. The blue  
622 color indicates a positive value of streaming toward the spindle, and the yellow color indicates a  
623 negative value of streaming opposite the spindle. After obtaining vector maps of consecutive  
624 frames, the mean value of the vectors within a specific square area below the spindle was  
625 calculated as the velocity and direction of cytoplasmic streaming, as shown in Fig 2**a,d**. To  
626 quantify the normalized velocity of cytoplasmic streaming, the velocity of cytoplasmic streaming  
627 minutes before and after the Ca<sup>2+</sup> transient was divided by the absolute maximum velocity during  
628 the same period. All Ca<sup>2+</sup> transients were selected for 30 min during spindle rotation. Heat maps  
629 of normalized cytoplasmic streaming were created using the GraphPad Prism9 software.

630

### 631 **Quantifications and statistical analysis**

632 Statistical analyses were performed using R or GraphPad Prism9. First, the normality of the data  
633 was checked using the Shapiro–Wilk test. The data shown in Extended Data Fig. 3**a** were  
634 parametric and tested using Welch’s t-test. The data in Fig. 7**b,g** are non-parametric and were  
635 tested using the Mann–Whitney *U* test. For representative images, experiments were performed  
636 at least thrice. All experiments involving eggs were performed at least two or more times, where  
637 *n* denotes the number of eggs.

638

### 639 **Data availability**

640 The data that support the finding of this study are available from the authors upon request.

641 **Method references**

- 642 40. Kishigami, S. & Wakayama, T. Efficient strontium-induced activation of mouse oocytes  
643 in standard culture media by chelating calcium. *J. Reprod. Dev.* **53**, 1207–1215 (2007).
- 644 41. Yamagata, K. *et al.* Noninvasive visualization of molecular events in the mammalian  
645 zygote. *Genesis* **43**, 71–79 (2005).
- 646 42. Thielicke, W. & Stamhuis, E. J. PIVlab – Towards User-friendly, Affordable and  
647 Accurate Digital Particle Image Velocimetry in MATLAB. *J. Open Res. Softw.* **2**,  
648 (2014).
- 649

650 **Acknowledgements**

651 We thank Tomo Kondo (The University of Tokyo) for advice on setting up a holding pipette, Kazuo  
652 Yamagata (Kindai University) for advice on the time-lapse imaging of mouse eggs, Atsuo Ogura  
653 (RIKEN BRC) and Junya Ito (Azabu University) for the human-PLC $\zeta$  constructs, Hiroshi Kimura  
654 (Tokyo Institute of Technology) for the mRFP1-tagged histone H2B constructs, Bill Bement  
655 (University of Wisconsin-Madison) for the EGFP-UtrCH constructs. The research was supported  
656 by the Japan Society for the Promotion of Science KAKENHI (grant numbers 21J11440 to T.T.;  
657 20H03250, 20H05356, 22H04664 and 23H02485 to M.O.).

658

659 **Author contributions**

660 T.T. and M.O. designed the research. T.T. performed all experiments and data analysis. T.T. and  
661 M.O. wrote the manuscript.

662

663 **Competing interests**

664 The authors declare no competing interests.

665 **Extended Data Figure legends**

666 **Extended Data Fig.1 Transient inversions in the direction of spindle rotation is dependent**  
667 **on Ca<sup>2+</sup> oscillations.**

668 **a,b,c**, Graphs showing the spindle rotation angle (magenta) and relative intensity of cytoplasmic  
669 Ca<sup>2+</sup> levels (green) (top panels), and the angular velocity of ( $\Delta t = 1$  min) of spindle rotation and  
670 changes in the relative intensity of cytoplasmic Ca<sup>2+</sup> for 30 min during spindle rotation (bottom  
671 panels) in four representative IVF **a**, or Sr<sup>2+</sup>-activated **b**, or human-PLC $\zeta$  expressing Sr<sup>2+</sup>-activated  
672 **c** eggs. **d**, Graphs showing the spindle rotation angle (magenta) and relative intensity of  
673 cytoplasmic Ca<sup>2+</sup> levels (green) in three representative thapsigargin-treated eggs. Orange bars  
674 indicate the time of thapsigargin addition.

675

676 **Extended Data Fig.2 Inversion of cytoplasmic streaming immediately after the Ca<sup>2+</sup>**  
677 **transient cause a reversal of spindle rotation.**

678 **a,c**, Graphs showing the velocity of cytoplasmic streaming (blue) and relative intensity of  
679 cytoplasmic Ca<sup>2+</sup> levels (green) in three representative Sr<sup>2+</sup>-activated eggs **a**, or Sr<sup>2+</sup>-activated  
680 eggs treated with 0.08  $\mu\text{g}/\text{mL}$  nocodazole **c**. **b**, Graphs showing the velocity of cytoplasmic  
681 streaming (blue) and angular velocity of spindle rotation ( $\Delta t = 1$  min) (magenta) in four  
682 representative Sr<sup>2+</sup>-activated eggs.

683

684 **Extended Data Fig.3 Inversed cytoplasmic streaming is oriented towards both maternal and**  
685 **paternal chromosomes.**

686 Representative images showing chromosomes (magenta) and cytoplasmic Ca<sup>2+</sup> levels (green) in  
687 an IVF egg at a time point before and immediately after the Ca<sup>2+</sup> transient merged with a bright  
688 field (top panels). Vector maps indicating the direction and velocity of cytoplasmic streaming  
689 analyzed using PIV (bottom panels). Black arrows indicate the positions of sperm chromosomes.  
690 Numbers above the top panels indicate the time after the onset of Ana-II.

691

692 **Extended Data Fig.4 Inhibition of myosin II activity decrease the velocity of cytoplasmic**  
693 **streaming but not compromise Ca<sup>2+</sup> oscillations.**

694 Graphs showing the velocity of cytoplasmic streaming (blue) and relative cytoplasmic Ca<sup>2+</sup> levels  
695 (green) in three representative blebbistatin-treated Ana-II eggs. Black arrowheads indicate the  
696 time of blebbistatin addition.

697

698 **Extended Data Fig.5 MLC phosphorylation at the cortex in Sr<sup>2+</sup> activated eggs.**

699 **a,b**, Left, three representative fluorescent images of F-actin and pMLC in Sr<sup>2+</sup> activated eggs  
700 with **a** or without **b** cortical pMLC singals. Right, graphs show the fluorescence intensity

701 profiles of F-actin and pMLC along the dashed white lines in the left panels. **c**, Left, three  
702 representative fluorescent images of F-actin and pMLC in 7% EtOH activated eggs. Right,  
703 graphs show the fluorescence intensity profiles of F-actin and pMLC along the dashed white  
704 lines in the left panels. White ellipses indicate the Ana-II spindle.



705 **Supplementary Videos**

706 **Supplementary Video 1**

707 **Dynamics of the Spindle and Chromosomes in an IVF Egg**

708 Time-lapse observation of an IVF egg injected with mRFP1-tagged histone H2B (to label  
709 chromosomes, magenta) and EGFP- $\alpha$ -tubulin (to label spindle, green). Video of chromosomes,  
710 merged with bright field (left), and chromosomes and the spindle (right). The number in videos  
711 indicate the time after Ana-II onset (hr :min).

712

713 **Supplementary Video 2**

714 **Dynamics of the chromosomes and  $\text{Ca}^{2+}$  oscillations in an IVF egg, or a  $\text{Sr}^{2+}$ -activated egg**

715 Time-lapse observation of an IVF (top panels), or a  $\text{Sr}^{2+}$ -activated egg (bottom panels) injected  
716 with mRFP1-tagged histone H2B (to label chromosomes, magenta) and Cal520-dextran (to label  
717 cytoplasmic  $\text{Ca}^{2+}$ , green). Video of chromosomes, merged with bright field (left), and  
718 chromosomes and cytoplasmic  $\text{Ca}^{2+}$  (right). The number in videos indicate the time after Ana-II  
719 onset (hr :min).

720

721 **Supplementary Video 3**

722 **Periodical inversion of cytoplasmic streaming in a  $\text{Sr}^{2+}$  activated egg**

723 Time-lapse observation of a  $\text{Sr}^{2+}$  activated egg injected with mRFP1-tagged histone H2B (to label  
724 chromosomes, magenta) and Cal520-dextran (to label cytoplasmic  $\text{Ca}^{2+}$ , green), merged with  
725 bright field (left). Colored heat maps of vectors indicate the direction and velocity of cytoplasmic  
726 streaming analyzed using PIV as v-component (right). The number in videos indicate the time  
727 after Ana-II onset (hr :min).

728

729 **Supplementary Video 4**

730 **Periodical inversion of cytoplasmic streaming in a  $\text{Sr}^{2+}$  activated egg in the absence of  
731 spindle rotation**

732 Time-lapse observation of a  $\text{Sr}^{2+}$  activated egg injected with mRFP1-tagged histone H2B (to label  
733 chromosomes, magenta) and Cal520-dextran (to label cytoplasmic  $\text{Ca}^{2+}$ , green), merged with  
734 bright field (left). Colored heat maps of vectors indicate the direction and velocity of cytoplasmic  
735 streaming analyzed using PIV as v-component (right). The number in videos indicate the time  
736 after  $\text{Sr}^{2+}$ -activation (hr :min).

737

738 **Supplementary Video 5**

739 **Suppression of  $\text{Ca}^{2+}$  oscillations in a  $\text{Sr}^{2+}$  activated egg**

740 Time-lapse observation of  $\text{Sr}^{2+}$  activated eggs injected with mRFP1-tagged histone H2B (to label

741 chromosomes, magenta) and Cal520-dextran (to label cytoplasmic  $\text{Ca}^{2+}$ , green). Video of  
742 chromosomes and cytoplasmic  $\text{Ca}^{2+}$  (left), and chromosomes, merged with bright field (right).  
743 Top and bottom panels show representative images of the formation of the small-sized PB2 or the  
744 large-sized PB2, respectively. The number in videos indicate the time after Ana-II onset (hr :min).

745

#### 746 **Supplementary Video 6**

##### 747 **Patterns of cytoplasmic streaming in an IVF Ana-II egg**

748 Time-lapse observation of an IVF egg injected with mRFP1-tagged histone H2B (to label  
749 chromosomes, magenta) and Cal 520-dextran (to label cytoplasmic  $\text{Ca}^{2+}$ , green), merged with  
750 bright field (left). Vector maps indicate the direction and velocity of cytoplasmic streaming  
751 analyzed using PIV (right). The number in videos indicate the time after Ana-II onset (hr :min).

752

#### 753 **Supplementary Video 7**

##### 754 **Decrease in the velocity of both inward and outward cytoplasmic streaming in a blebbistatin 755 treated egg**

756 Time-lapse observation of a  $\text{Sr}^{2+}$  activated egg injected with mRFP1-tagged histone H2B (to label  
757 chromosomes, green) and Cal 590-dextran (to label cytoplasmic  $\text{Ca}^{2+}$ , green) in the presence of  
758 blebbistatin, merged with bright field (left). Colored heat maps of vectors indicate the direction  
759 and velocity of cytoplasmic streaming analyzed using PIV as v-component (right). The number  
760 in videos indicate the time after Ana-II onset (hr :min).

761

#### 762 **Supplementary Video 8**

##### 763 **Periodic changes in F-actin intensity in a $\text{Sr}^{2+}$ activated egg**

764 Time-lapse observation of a  $\text{Sr}^{2+}$  activated egg injected with mRFP1-tagged histone H2B (to label  
765 chromosomes, magenta) and EGFP-UtrCH (to label F-actin, green). The number in videos  
766 indicate the time after Ana-II onset (hr :min).

# Fig. 1

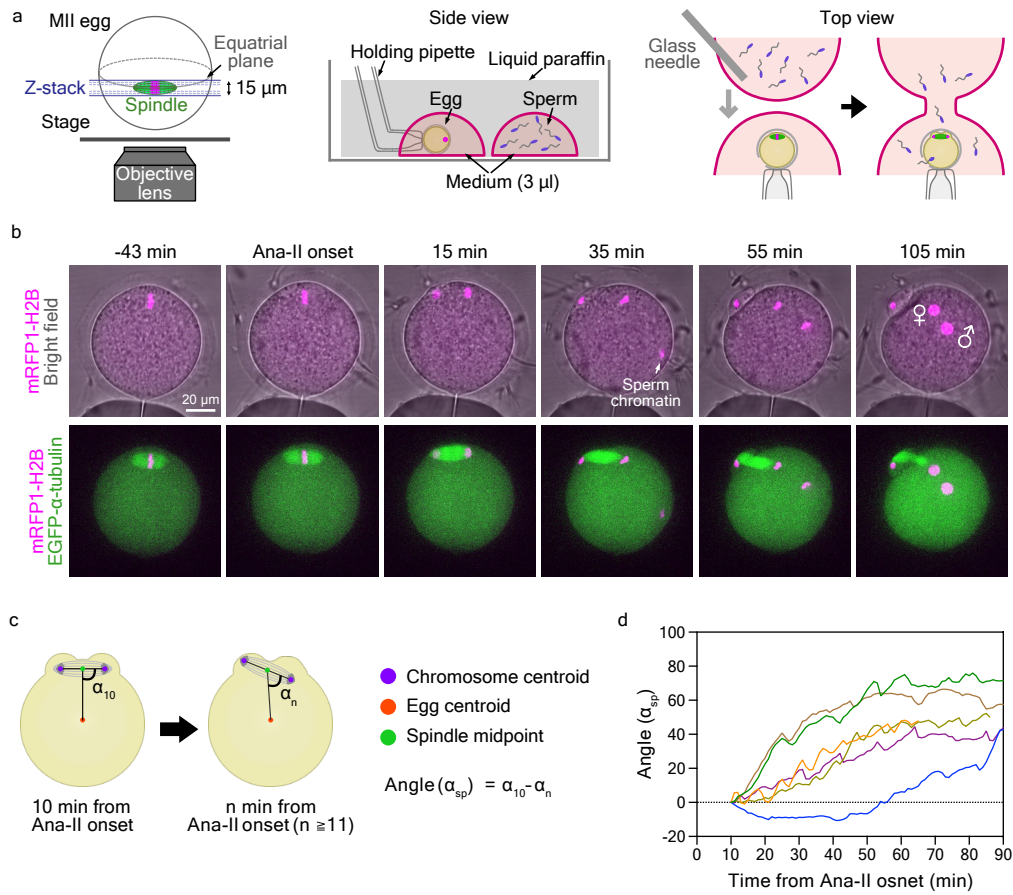

## Fig.2

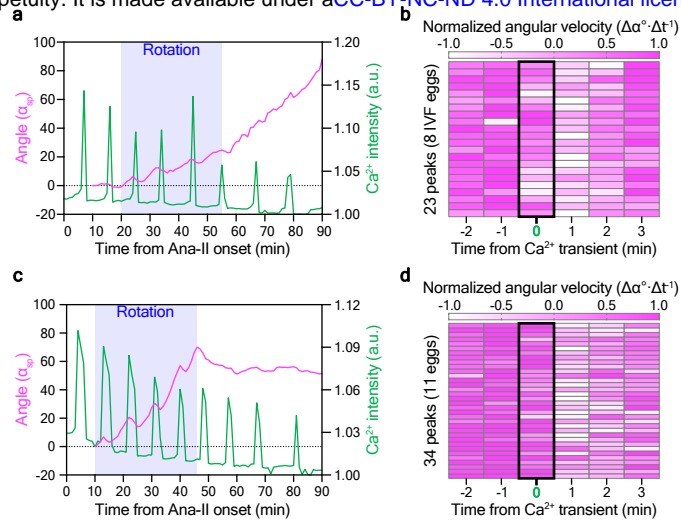

## Fig.3

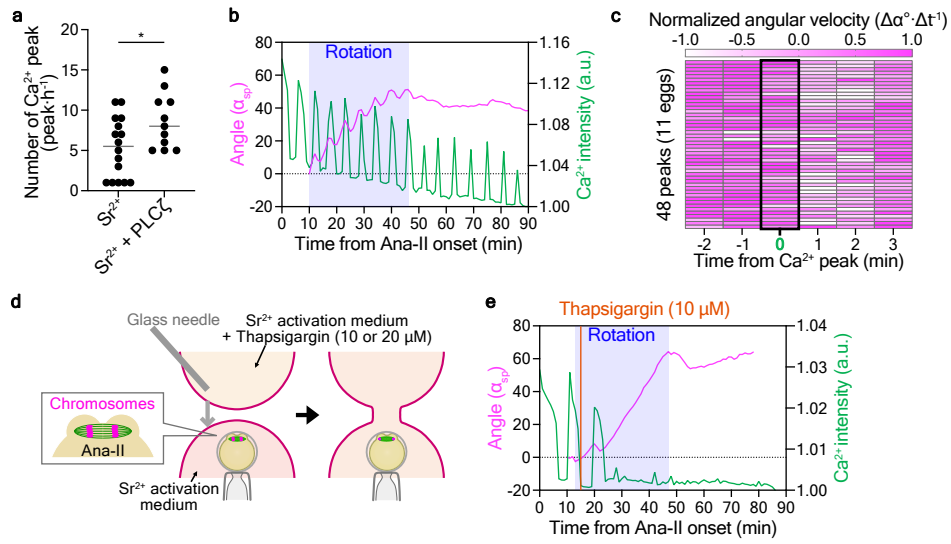

## Fig.4

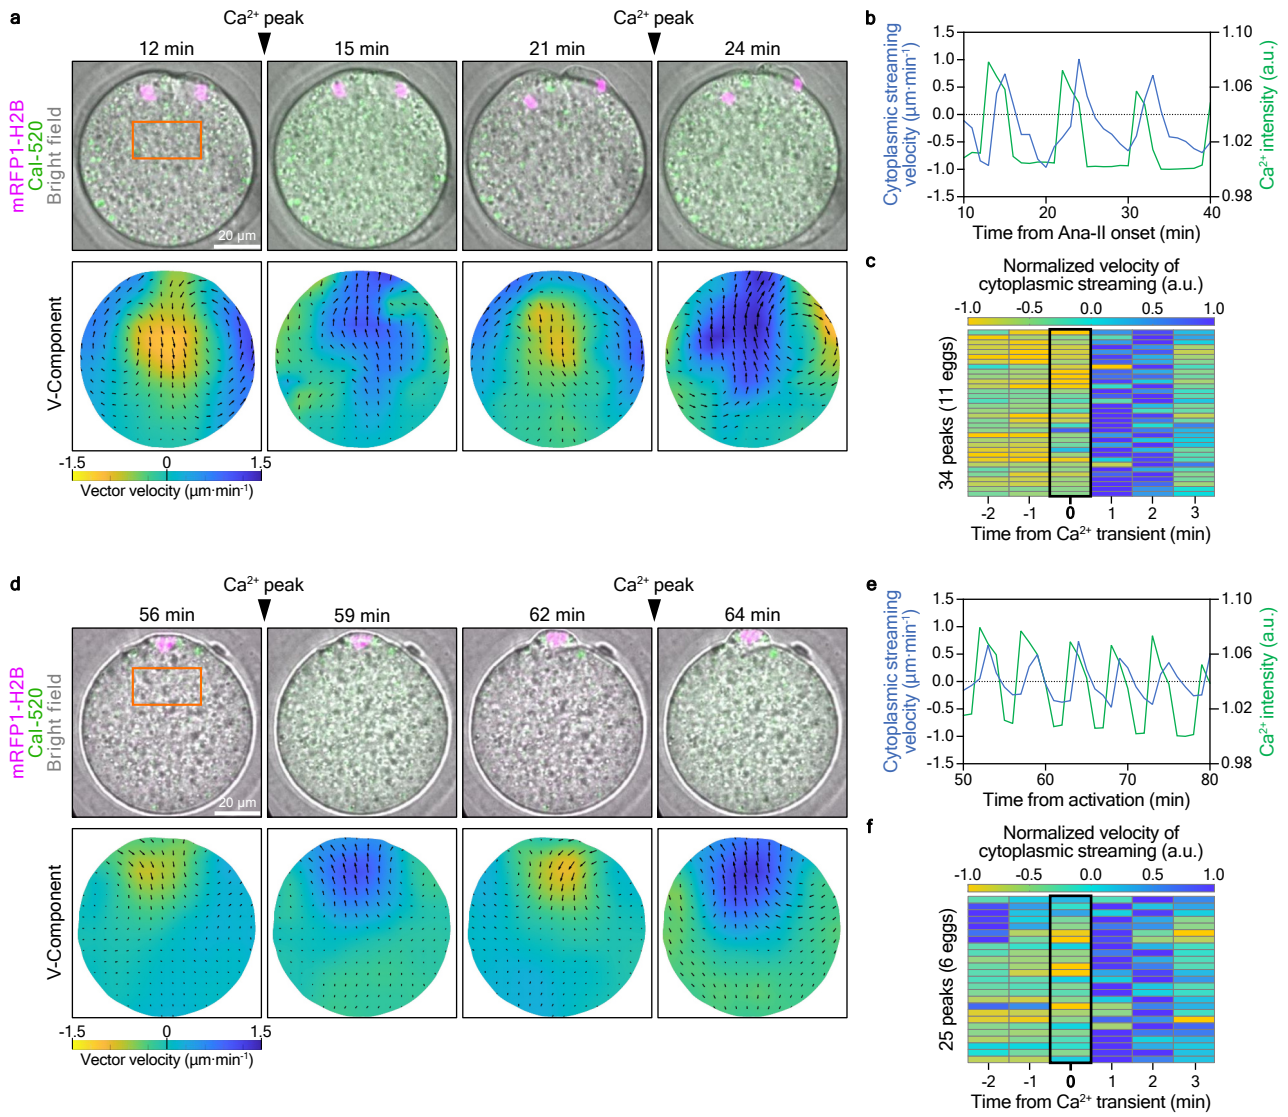

## Fig.5

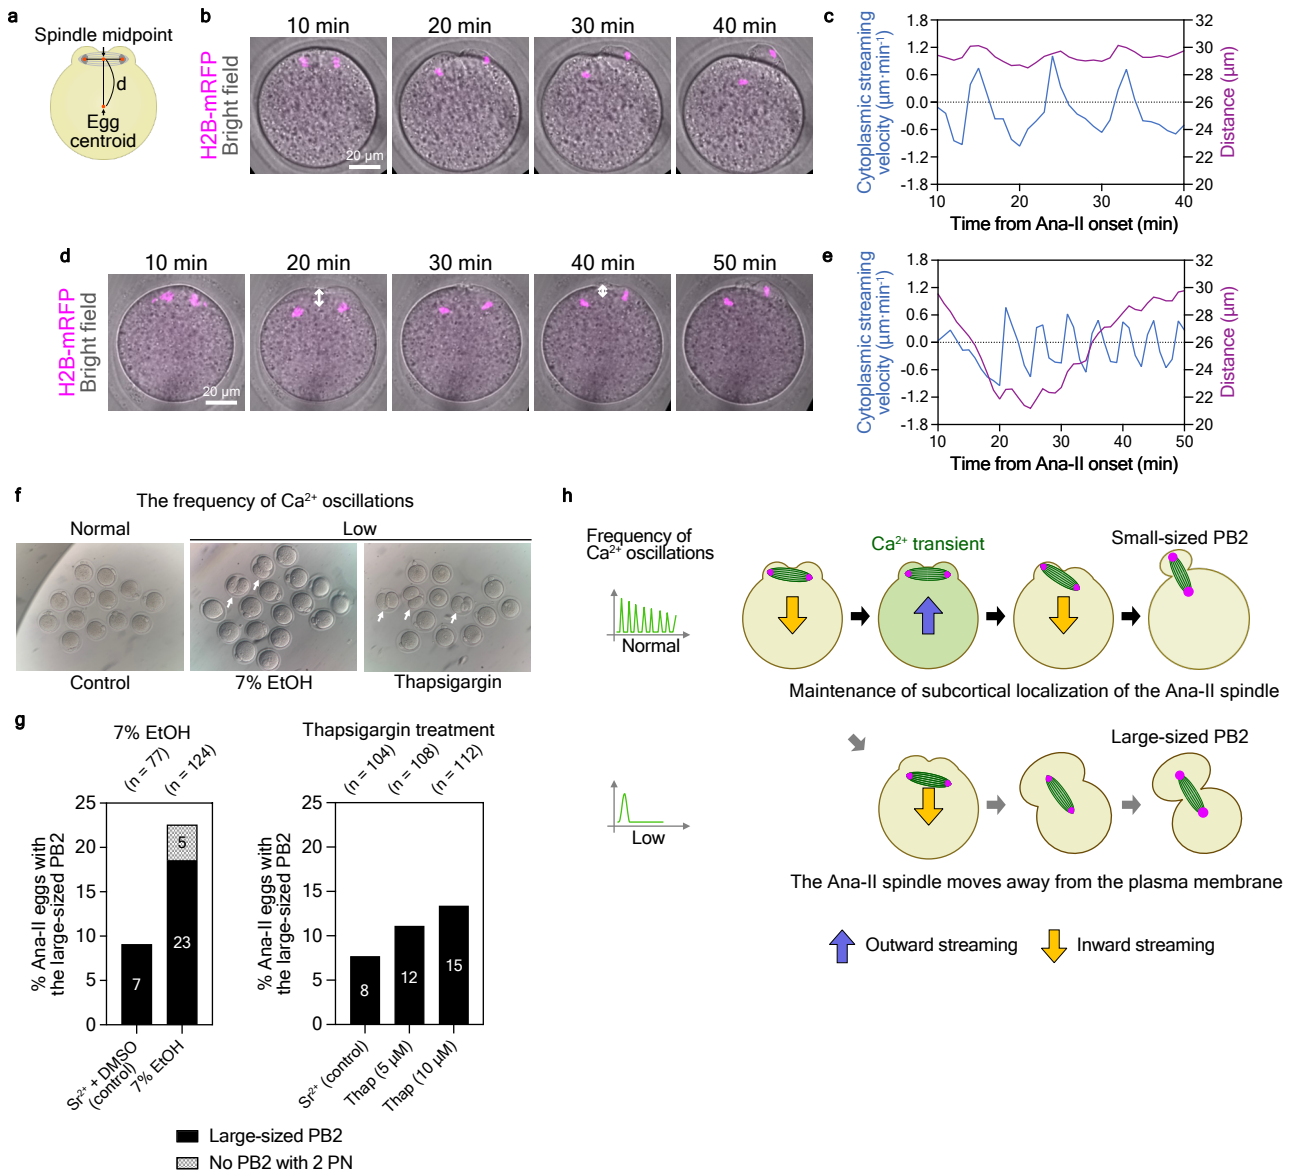

## Fig.6

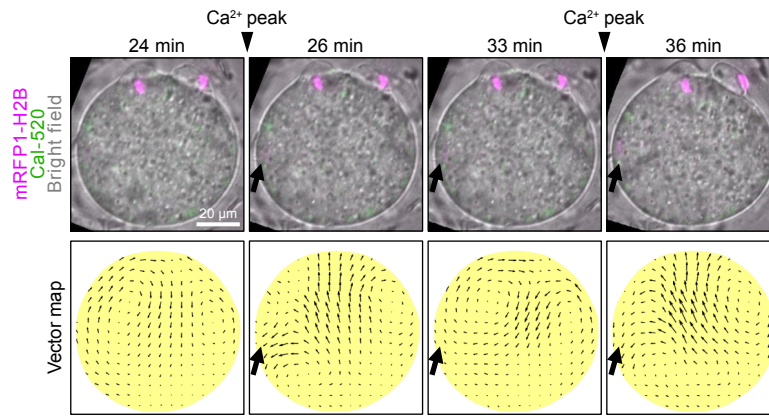



## Fig.7

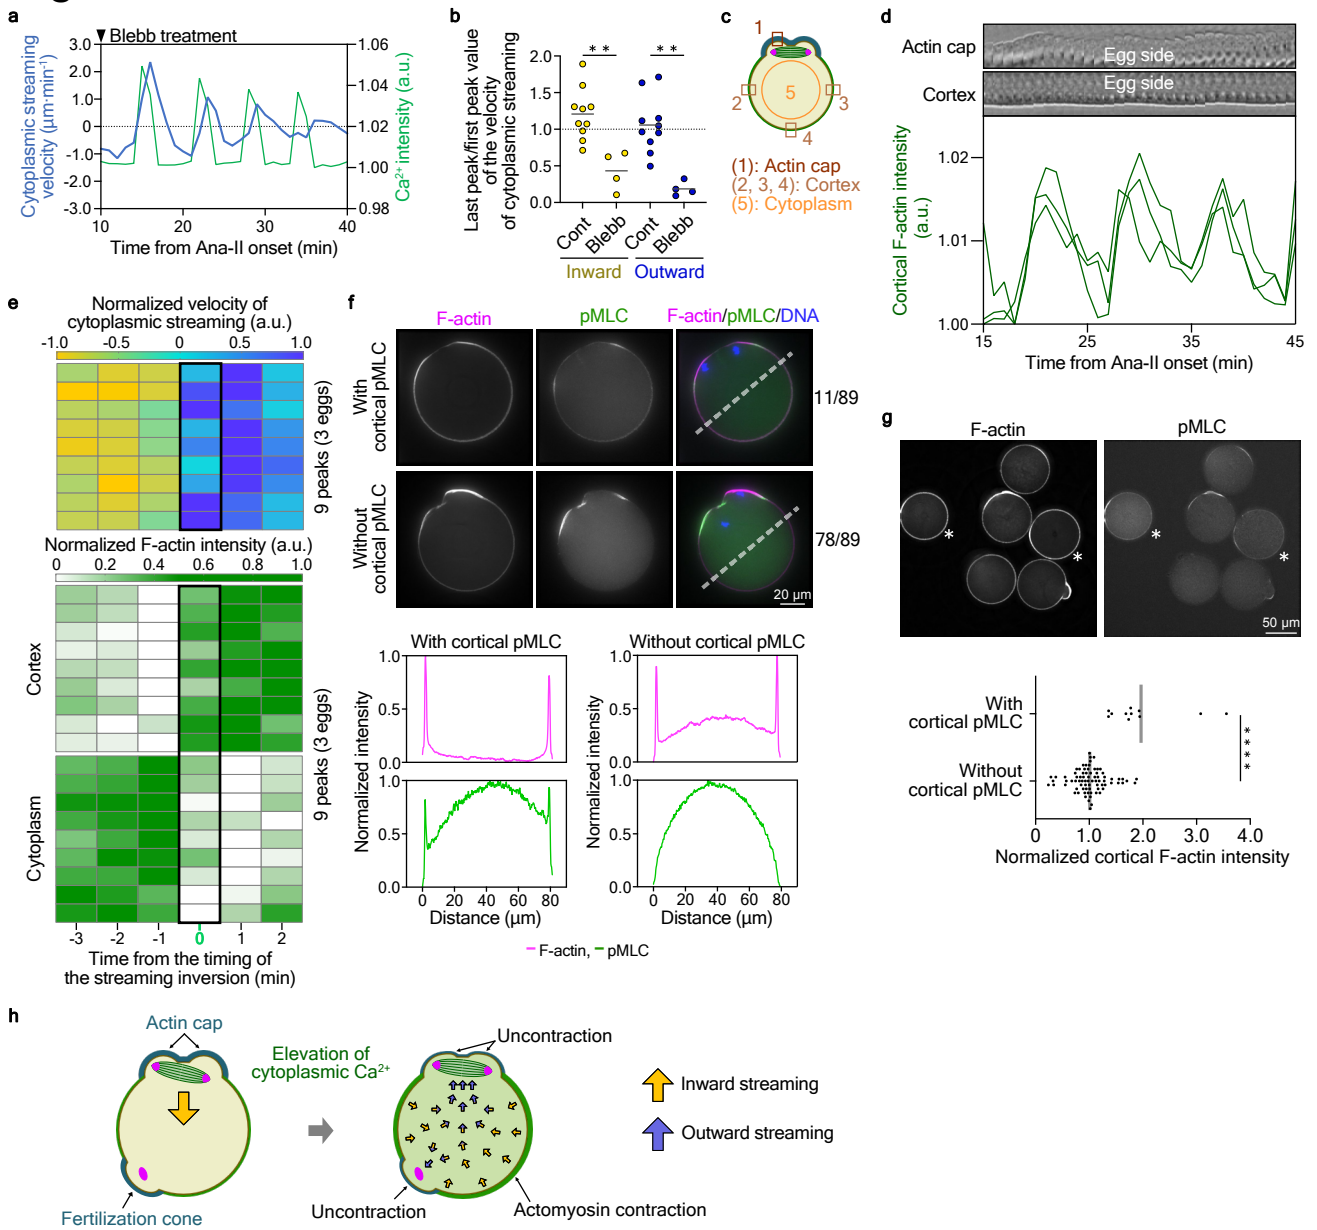

# Extended data Fig. 1

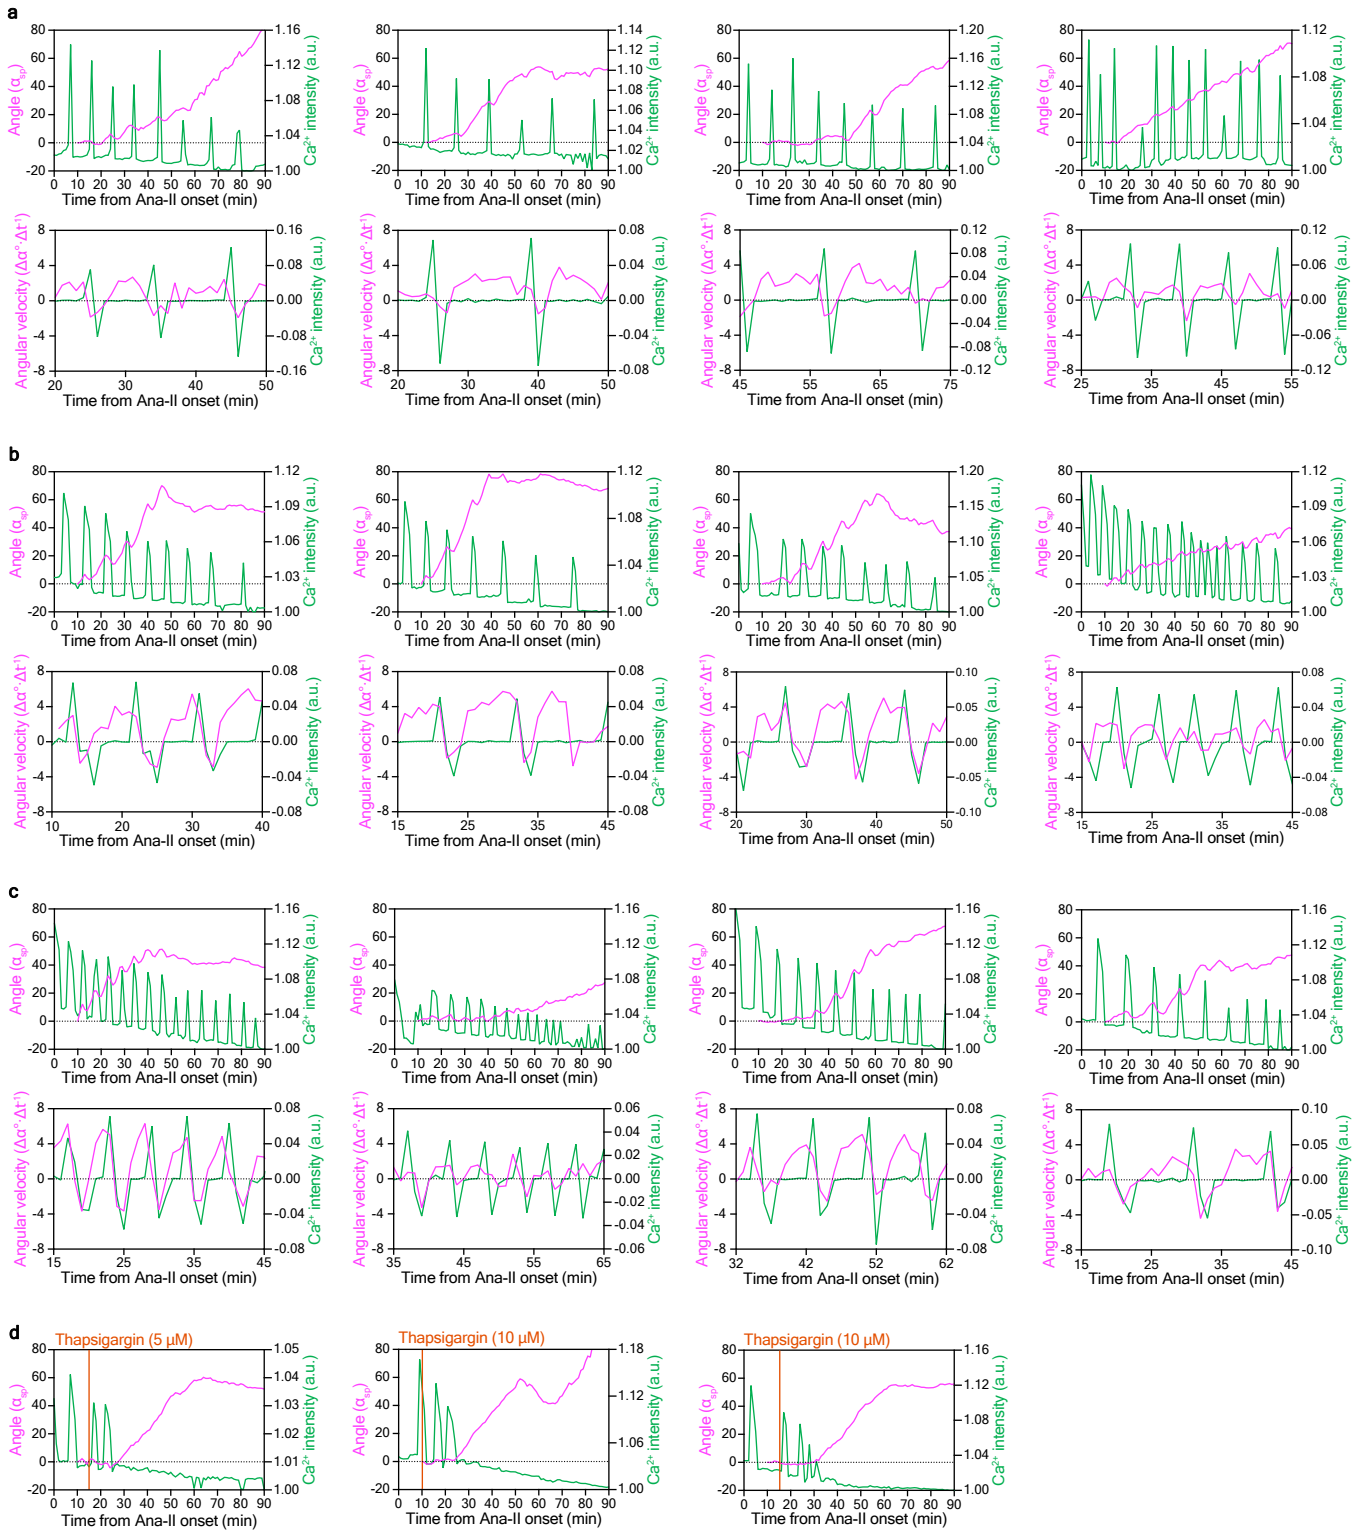

## Extended data Fig.2

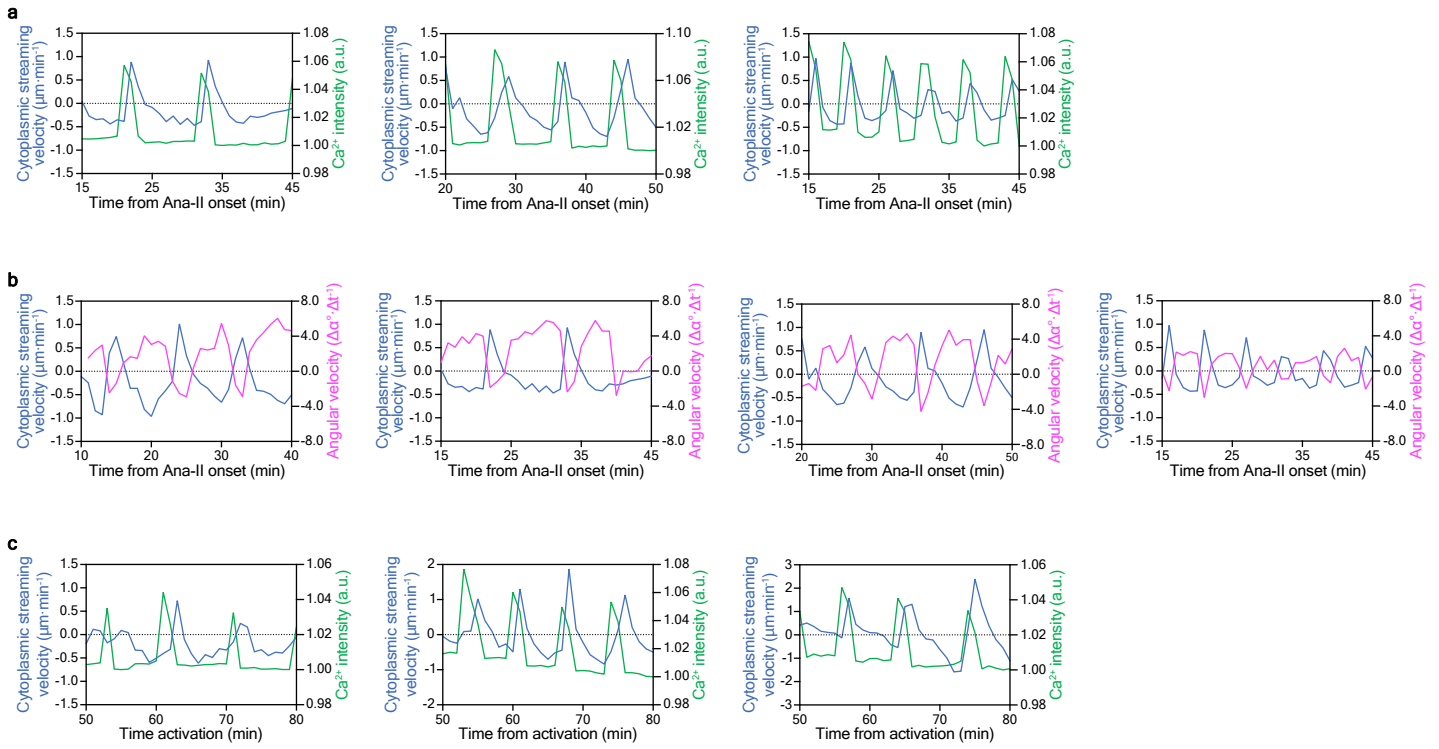

## Extended data Fig.3

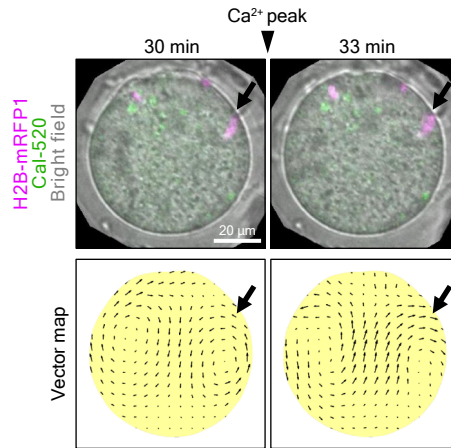

## Extended data Fig.4

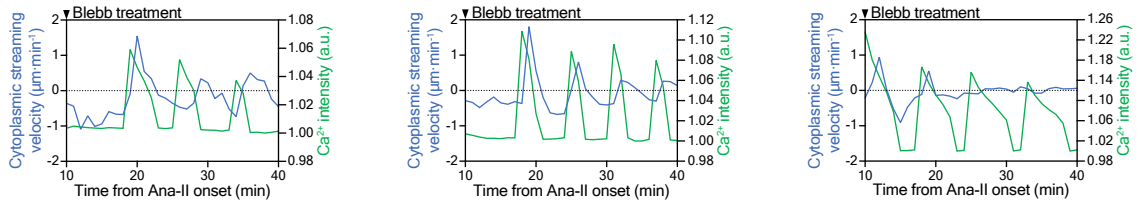

## Extended data Fig.5

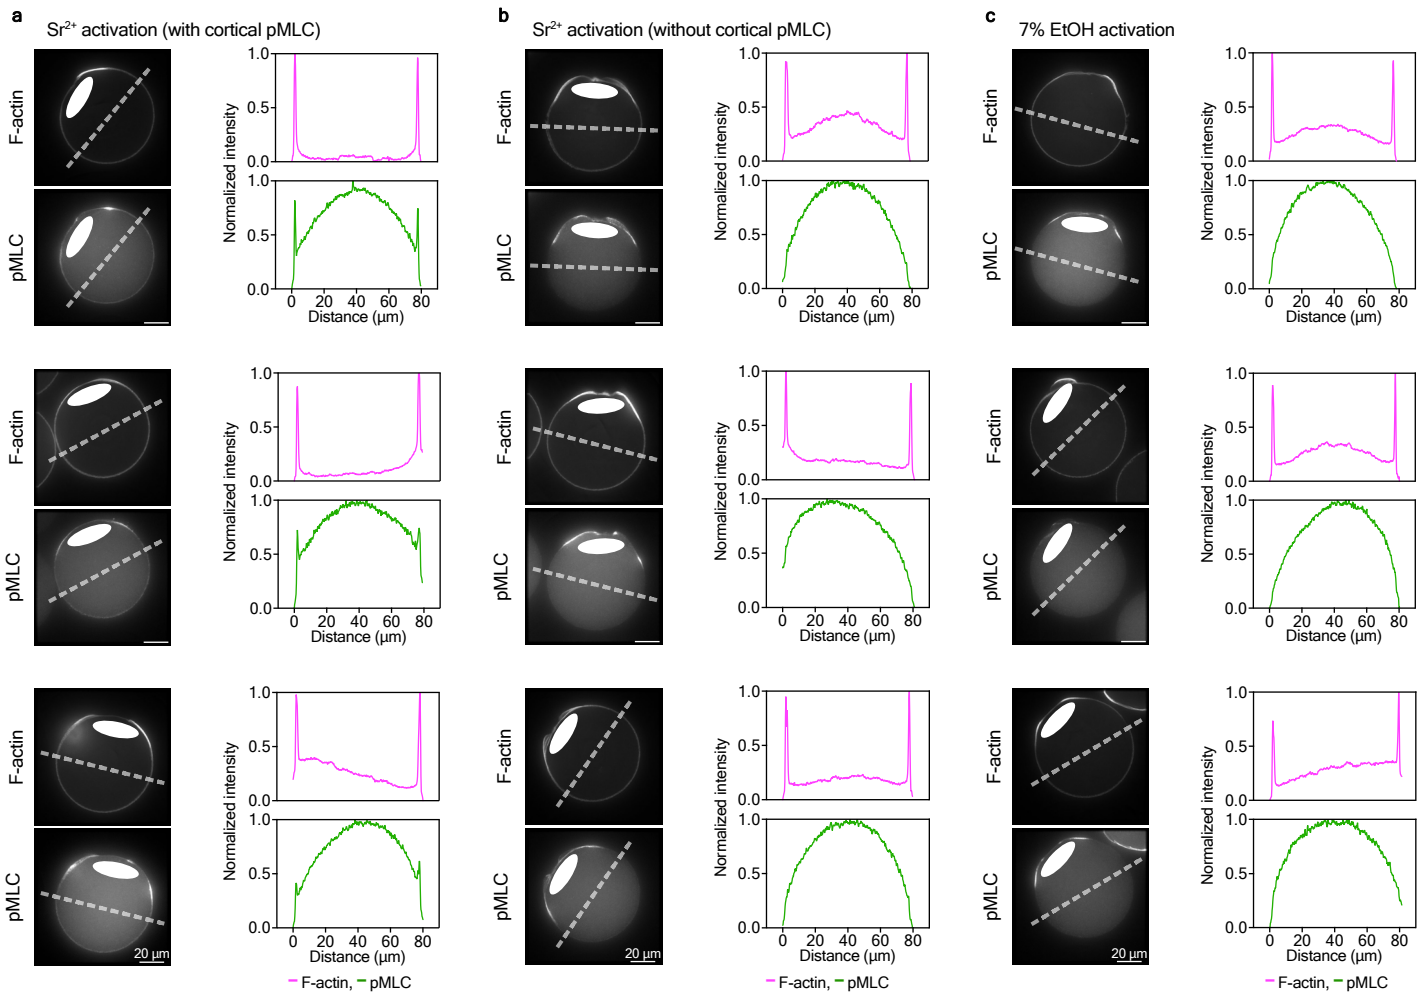

Source: https://www.biorxiv.org/content/10.1101/2024.02.05.578955.full.pdf
